# Supplementary material for: Whole genome and transcriptome reveal flavone accumulation in Scutellaria baicalensis roots
Source: Front Plant Sci. 2022 Oct 17;13:1000469. doi: 10.3389/fpls.2022.1000469 (PMC9618734; doi:10.3389/fpls.2022.1000469)
Supplement: Supplementary file 8 [file Table_5.xlsx]

## Sheet: Sheet1
Supplementary Table S5 S. baiMYB of FPKM in different tissues (roots, stems, flowers, leaves) of purple, pink roots and white roots.
name	White-R1	White-R2	White-R3	Pink-R1	Pink-R2	Pink-R3	Purple-R1	Purple-R2	Purple-R3
evm.TU.contig357.421	426.041	447.436	389.436	93.8912	145.792	107.917	748.076	772.578	761.217
evm.TU.contig57.4	210.633	310.12	254.714	120.244	220.547	179	557.028	545.551	602.668
evm.TU.contig305.427	79.1412	100.434	89.0923	28.0696	44.8777	36.2939	267.055	249.122	345.557
evm.TU.contig579.80	66.2775	59.8044	61.6221	44.596	55.7163	79.9122	207.329	213.235	326.972
evm.TU.contig81.1	450.089	618.013	594.16	665.027	252.207	636.799	297.868	337.216	307.599
evm.TU.contig459.153	236.855	362.306	334.265	173.848	156.196	212.107	170.727	195.46	210.298
evm.TU.contig507.450	62.7449	111.324	107.747	1027.69	974.721	1240.98	265.957	337.251	203.467
evm.TU.contig587.69	88.8426	140.079	128.717	182.691	249.18	241.096	148.296	144.562	187.017
evm.TU.contig333.3	148.808	107.446	114.293	135.833	126.325	147.93	157.683	163.538	168.445
evm.TU.contig215.18	152.216	329.502	258.825	293.31	193.815	227.742	167.359	156.317	159.244
evm.TU.contig579.64	13.0587	6.0936	11.1334	16.663	16.9862	15.5501	108.38	98.3004	140.311
evm.TU.contig69.12	46.2263	53.576	62.3102	22.0948	10.0104	20.0827	110.202	125.588	132.114
evm.TU.contig205.137	159.584	175.933	170.701	60.3623	73.4156	113.428	120.036	138.539	129.996
evm.TU.contig45.9	47.8827	63.9306	59.2157	75.4337	53.9116	68.9898	90.5239	82.3982	119.621
evm.TU.contig591.29	58.7552	43.9444	67.5859	109.631	70.1339	93.3053	106.767	115.279	114.019
evm.TU.contig357.471	0.426956	0.138513	0.274652	9.57126	5.94388	3.99434	76.5516	62.1733	100.56
evm.TU.contig370.138	160.726	183.264	170.981	145.895	95.5479	147.876	90.6447	98.4795	96.0206
evm.TU.contig87.212	16.9984	28.2776	24.2057	43.8194	50.6883	48.7471	73.569	60.9657	89.4921
evm.TU.contig522.838	61.3403	91.7436	74.568	222.835	234.009	191.789	97.0098	105.439	88.9053
evm.TU.contig369.211	106.734	156.795	149.951	69.939	68.6337	107.327	69.1209	77.808	87.6335
evm.TU.contig205.28	0.922986	1.38829	1.1335	42.2251	66.6492	45.6602	88.5396	81.3865	86.374
evm.TU.contig195.147	82.799	70.8635	67.4663	58.3156	46.3976	72.1336	66.0574	73.0739	83.4133
evm.TU.contig206.177	87.3471	88.1893	92.3348	80.6321	77.9078	78.492	70.2496	62.6927	75.5035
evm.TU.contig591.116	233.513	206.92	200.465	138.706	127.564	129.368	105.08	110.833	75.2966
evm.TU.contig136.18	12.6205	13.3767	15.5976	49.1802	38.1456	54.1827	70.0617	71.1688	74.5913
evm.TU.contig300.267	26.0367	26.4187	27.4396	19.7699	24.3733	22.3141	82.0924	70.9383	73.3926
evm.TU.contig583.171	44.9732	61.891	48.0713	78.9276	45.9573	70.6538	63.2832	55.5799	68.3767
evm.TU.contig308.72	100.794	123.744	110.598	111.803	108.944	137.308	64.3838	71.8813	67.0988
evm.TU.contig195.212	64.3992	61.9566	62.1757	43.9737	59.6718	61.3444	50.5854	54.9508	63.6428
evm.TU.contig522.251	36.2225	42.6655	34.824	71.1019	49.1557	81.5696	52.7961	42.5843	63.146
evm.TU.contig522.467	61.0902	69.3659	67.3961	87.6785	108.234	122.004	59.7789	67.3417	62.7107
evm.TU.contig514.31	36.8384	52.1923	47.351	56.4279	49.81	60.7248	51.0926	45.1613	61.8371
evm.TU.contig583.92	19.2409	22.4103	21.6095	41.0444	26.8443	38.9357	63.0443	66.4892	55.4719
evm.TU.contig317.141	16.8192	16.0975	18.8711	17.105	158.605	35.8961	35.3939	34.4824	54.9434
evm.TU.contig580.151	62.9016	48.101	47.1108	40.7514	40.5979	36.6625	43.36	43.2365	54.0816
evm.TU.contig39.21	51.7695	54.2796	51.6425	56.6447	67.4003	51.474	66.3425	60.3583	53.7565
evm.TU.contig64.151	2.18303	0.424929	1.26386	61.9316	44.5544	57.6951	43.9532	55.52	53.7482
evm.TU.contig289.125	20.2138	28.501	25.1561	181.297	64.4501	132.295	64.9366	67.8882	51.4902
evm.TU.contig273.217	80.1642	126.658	115.232	70.8889	30.6108	69.5663	46.7161	59.336	51.3021
evm.TU.contig126.220	42.1897	30.3207	37.4964	27.7841	57.2968	33.1921	44.3895	38.4647	50.4647
evm.TU.contig39.22	53.666	56.5586	58.1453	55.5894	73.5836	60.7261	61.8564	57.1475	50.3356
evm.TU.contig455.612	0.914545	0.890089	0.588307	11.9004	26.0643	22.1028	55.7222	61.4659	49.1443
evm.TU.contig64.422	103.626	114.411	104.363	64.7971	53.8219	74.4432	45.8112	46.9734	47.8762
evm.TU.contig350.30	41.9961	43.9879	44.5901	59.0741	58.1287	73.9407	47.7234	50.4363	46.8579
evm.TU.contig273.357	10.9822	10.7671	14.1812	40.2622	51.9245	47.6569	40.7057	46.3165	46.8327
evm.TU.contig244.196	93.9909	116.004	109.592	56.8991	52.2991	61.555	48.3191	51.9078	45.8013
evm.TU.contig600.126	7.77651	6.38597	8.08992	5.8235	6.70248	5.30485	46.429	41.9459	45.3021
evm.TU.contig522.1150	35.4309	47.4147	40.0312	16.1397	21.9371	17.9687	36.5956	33.4799	44.5073
evm.TU.contig168.474	79.5076	75.4039	81.7149	47.1722	40.3396	47.9837	41.3735	45.2546	43.9572
evm.TU.contig62.45	59.3593	79.7089	76.4592	70.0189	50.0854	73.5636	39.6063	44.0521	43.7701
evm.TU.contig432.31	34.2249	31.3607	32.3216	34.4777	36.5094	39.3137	38.727	37.1924	40.98
evm.TU.contig56.51	57.0473	63.3515	65.8983	43.5442	37.9993	45.307	41.7322	43.691	40.4179
evm.TU.contig127.139	49.3527	60.6855	59.4685	69.9733	57.482	83.9905	36.3538	40.6345	39.0454
evm.TU.contig591.12	12.4319	23.1088	14.8055	16.8824	13.9445	18.1617	30.7798	26.4312	36.8544
evm.TU.contig357.426	25.2885	30.5742	26.22	35.4542	38.6794	34.8997	32.6059	30.4103	36.831
evm.TU.contig290.16	25.6382	25.4256	26.6147	31.1839	32.0761	29.6503	45.2683	45.7507	36.4696
evm.TU.contig168.268	47.7791	46.2078	45.7828	34.2758	33.7285	34.8272	34.0008	31.6761	35.2703
evm.TU.contig522.1692	3.0873	2.6761	3.90993	10.9631	11.2138	10.7559	34.4191	32.9738	34.9145
evm.TU.contig455.366	36.7527	42.7961	40.4504	32.0885	31.2241	32.9381	30.7441	31.077	34.754
evm.TU.contig378.64	52.577	47.5316	49.9671	30.9492	30.627	39.7825	26.5335	26.6836	33.5374
evm.TU.contig126.148	59.2207	53.8635	59.4494	35.4322	35.3243	36.6871	29.1932	30.0177	33.3772
evm.TU.contig583.170	26.3386	38.3105	26.811	37.5879	24.4043	44.6782	44.6633	33.6001	33.2555
evm.TU.contig369.119	23.0895	26.4467	24.4771	26.4085	49.7571	36.6141	22.5067	22.6728	33.1479
evm.TU.contig9.4	60.5463	54.8558	57.2184	107.562	91.5476	106.593	32.8961	34.415	32.9835
evm.TU.contig455.365	29.5388	34.6037	31.4049	31.9556	34.2772	37.4596	32.8136	34.5174	32.3113
evm.TU.contig312.23	60.283	50.6586	53.8119	32.2297	38.7144	45.1342	45.8583	50.097	31.9657
evm.TU.contig357.464	36.4739	35.4985	43.1131	29.076	29.4005	38.7435	29.0911	29.4816	31.6565
evm.TU.contig168.691	22.7291	31.7072	23.7594	36.6773	25.0751	30.7146	27.7668	27.5577	31.1637
evm.TU.contig64.14	8.41483	14.4575	14.3336	17.5231	26.4563	16.5347	27.8883	26.6251	31.141
evm.TU.contig168.634	34.2225	48.2632	40.3999	30.3567	37.5559	38.9499	27.9294	25.9671	30.8687
evm.TU.contig34.26	53.6056	57.0273	57.1513	40.0356	37.0241	45.681	35.1248	34.2905	30.8394
evm.TU.contig34.123	22.9885	28.0131	25.9499	34.8593	29.6295	42.8659	30.4989	33.0942	30.226
evm.TU.contig273.40	14.17	16.6429	15.4031	39.9267	80.403	41.0859	34.3224	33.5021	29.2613
evm.TU.contig559.113	77.252	76.8223	82.2602	37.8759	20.6194	30.8216	30.5251	34.6258	29.0993
evm.TU.contig480.35	26.0883	24.1754	26.1876	16.9664	19.0561	21.056	28.538	24.8431	28.7119
evm.TU.contig357.58	18.4854	29.9017	22.3787	12.4371	32.775	25.2201	21.6328	19.3469	28.295
evm.TU.contig370.380	37.8387	27.7987	31.5529	28.2697	35.0761	33.5058	21.5278	24.8725	28.2193
evm.TU.contig168.91	0.783991	0.654022	0.864556	8.48451	5.91317	9.60474	22.6322	23.694	28.1004
evm.TU.contig358.57	37.5935	34.7428	38.7981	20.5191	26.7905	24.1094	22.2437	21.0719	27.0842
evm.TU.contig48.2	55.7099	58.0588	56.5305	31.0599	27.8422	42.5996	26.1138	25.9806	25.8823
evm.TU.contig522.89	30.12	30.2939	29.1928	19.9126	26.7481	23.5866	22.3793	27.2051	25.8495
evm.TU.contig233.73	47.4355	55.7979	57.9721	47.4139	38.8031	50.1454	29.8936	29.2707	25.7203
evm.TU.contig168.306	87.3693	61.5795	72.5062	22.9408	24.789	31.9286	23.6391	32.2758	25.3302
evm.TU.contig317.76	9.64912	7.21101	5.32035	7.92509	39.919	18.2692	25.386	25.5298	25.1173
evm.TU.contig375.41	37.2816	31.3986	34.2266	8.2068	5.57734	6.35202	21.5896	21.9365	24.9588
evm.TU.contig269.27	10.7402	12.8621	11.6993	14.3345	13.8853	13.3775	24.2312	23.9994	24.266
evm.TU.contig509.177	8.00639	10.3332	8.64921	6.18906	7.20063	8.68439	16.115	15.8187	24.0795
evm.TU.contig455.337	8.82376	9.62664	11.9474	22.0029	26.7475	35.5052	25.3603	32.2823	23.972
evm.TU.contig509.119	3.56806	0.762289	2.93905	11.4363	23.042	22.9322	22.0622	19.6737	23.3313
evm.TU.contig273.384	53.9197	98.289	78.5788	63.7657	25.3275	64.3558	19.1438	23.4296	23.2917
evm.TU.contig94.11	28.668	30.8937	25.3371	17.8571	21.674	18.3335	21.7375	21.9584	23.2518
evm.TU.contig587.35	61.8673	62.5699	51.4115	179.724	86.574	191.729	45.4613	73.1459	23.0598
evm.TU.contig127.59	50.2032	51.7886	53.522	25.2905	33.1895	30.7836	22.7974	28.8644	22.3387
evm.TU.contig223.8	16.2624	18.36	22.4708	7.94494	13.8402	15.417	17.8771	17.5871	22.0663
evm.TU.contig289.147	89.3916	278.98	199.535	12.3712	13.2591	11.5796	22.0701	14.7762	22.062
evm.TU.contig606.25	53.0789	53.0727	54.953	52.2966	38.3518	51.1919	24.7378	26.2864	21.017
evm.TU.contig455.185	17.4798	12.9831	13.7596	17.8977	15.1034	17.5723	22.3089	15.4579	20.8533
evm.TU.contig126.234	24.7899	25.4248	25.4993	14.7588	10.651	18.6178	22.0909	25.0435	20.7975
evm.TU.contig357.430	9.92821	16.975	12.4927	9.64518	9.30367	8.78616	17.9429	16.7022	20.6586
evm.TU.contig340.126	18.6568	17.0519	17.454	22.9142	20.8213	28.0566	18.372	19.8907	20.3563
evm.TU.contig522.23	49.2865	55.2388	51.7099	30.3789	23.4821	30.8282	20.6292	21.5806	20.2929
evm.TU.contig370.232	2.8755	4.43112	4.56657	28.4797	18.1746	26.0607	25.7079	24.432	20.1343
evm.TU.contig204.103	33.829	28.3179	29.7224	17.8134	27.697	21.3529	18.2446	18.9626	20.1343
evm.TU.contig522.154	81.2421	42.3399	48.4953	30.2867	24.3445	30.8262	19.6568	23.182	19.9935
evm.TU.contig522.1231	10.5716	13.4526	12.8893	7.05283	8.73952	8.0075	14.312	13.6861	19.7286
evm.TU.contig139.181	22.9967	23.085	24.3638	10.7778	6.16337	12.2617	17.4294	18.1804	19.2372
evm.TU.contig388.19	16.7921	21.9904	18.7904	36.9029	35.1594	32.1802	20.2854	21.856	19.2066
evm.TU.contig126.366	0.134398	0.130804	0.216139	0.900397	1.20028	0.873159	12.8715	11.5647	19.0838
evm.TU.contig370.284	25.6388	24.8943	26.8982	20.0529	19.2506	24.3255	16.3072	18.473	18.5746
evm.TU.contig558.3	12.5221	24.7226	21.5764	4.42503	3.80605	7.94938	12.8821	21.7231	18.4564
evm.TU.contig299.8	29.0204	30.0215	27.9394	19.4589	17.3183	18.8116	23.3375	18.8768	18.1973
evm.TU.contig480.149	18.1029	24.5385	24.7505	23.8867	21.204	22.7262	20.4961	24.1849	18.0396
evm.TU.contig357.429	9.69661	14.5849	13.2313	11.2056	6.71485	7.40691	17.3453	15.8587	17.6079
evm.TU.contig116.63	18.6685	24.6835	19.026	14.5429	14.5114	14.921	16.6424	18.9553	17.5044
evm.TU.contig106.251	3.24129	3.6527	4.03293	2.96711	4.10011	6.58338	11.3447	8.59912	17.4675
evm.TU.contig317.110	7.79753	8.33436	9.80804	7.26542	6.91261	6.83896	16.3708	14.2502	16.9781
evm.TU.contig289.82	9.18817	7.9045	8.07424	7.10259	6.20604	13.9427	11.514	13.0949	16.864
evm.TU.contig134.33	31.6972	25.3375	26.6188	13.2751	9.2137	15.6673	15.6397	18.8365	16.5644
evm.TU.contig299.57	3.72193	1.33457	2.64627	11.8113	17.6747	15.4247	16.9855	18.6265	16.4596
evm.TU.contig206.198	17.0772	20.3088	17.3113	13.9426	18.3333	16.7542	14.3111	17.1092	16.2349
evm.TU.contig603.64	16.3089	18.2333	18.3192	35.6876	51.0768	46.7508	10.6935	7.47346	16.212
evm.TU.contig264.5	0	0.246598	0.32598	4.96183	19.5003	7.37461	14.5224	7.67598	15.9094
evm.TU.contig305.125	16.8643	20.742	20.0875	20.4856	11.3421	15.7964	16.069	18.2584	15.837
evm.TU.contig522.1548	7.8941	21.1619	20.9806	17.1291	14.7331	11.445	13.5351	11.5292	15.6961
evm.TU.contig168.735	13.695	14.3443	13.0258	13.0062	16.2905	14.5409	16.964	14.7927	15.4957
evm.TU.contig106.147	5.41842	2.50708	4.11409	0.411985	0.069996	0.277002	10.0518	15.0606	15.3437
evm.TU.contig600.201	0.507081	0.197408	0.097858	4.46858	1.59834	2.92543	11.2529	10.3016	15.0611
evm.TU.contig357.550	0.309116	0.90255	0.99424	20.8684	39.7047	27.3927	19.7616	20.4607	14.9799
evm.TU.contig433.81	191.37	188.248	207.621	93.2931	46.9193	120.774	17.4223	23.4179	13.8641
evm.TU.contig139.149	3.96303	2.46423	3.87711	19.9977	12.5784	21.1984	13.9943	14.377	13.5949
evm.TU.contig75.124	14.867	19.5553	15.9078	17.9783	16.5871	17.3285	14.7103	14.4461	13.5762
evm.TU.contig78.107	13.0201	9.34011	9.58499	10.3251	12.3828	16.9324	13.5677	12.9444	13.4667
evm.TU.contig305.47	5.47109	0.998396	1.64973	5.99141	53.8011	44.0752	17.5049	33.4279	13.3634
evm.TU.contig317.90	20.4446	22.6885	21.1445	13.3171	11.4629	14.6849	14.6633	15.4541	13.3378
evm.TU.contig522.1422	16.1984	21.457	18.9891	12.2705	13.3132	14.872	14.5291	15.9162	12.9149
evm.TU.contig76.33	150.362	116.142	121.079	20.8932	19.6069	22.0605	13.5512	15.7241	12.7364
evm.TU.contig552.74	9.12322	9.40156	11.3923	19.9126	17.0567	20.78	11.4361	12.7059	12.7237
evm.TU.contig299.9	13.9451	16.6353	14.0633	14.2233	18.9635	17.8177	13.2359	15.7538	12.7164
evm.TU.contig62.172	0.53947	1.5095	0.845885	5.36911	2.65693	5.41495	8.77065	11.3819	12.5971
evm.TU.contig205.55	21.2411	25.4843	21.3158	15.5539	14.2123	15.9276	14.7287	15.0134	12.2255
evm.TU.contig127.179	12.4199	14.6993	13.6116	21.7498	16.5533	18.2895	12.2248	12.9402	12.2244
evm.TU.contig244.164	0.748207	1.14431	0.515684	5.288	6.23287	7.58307	9.58218	11.1022	11.9469
evm.TU.contig8.96	35.1928	29.4847	35.1835	18.3701	25.1592	32.1039	11.7305	16.9721	11.485
evm.TU.contig220.21	0	0.604116	0	8.6368	1.95652	12.8239	9.5784	19.1997	11.4013
evm.TU.contig244.71	31.8418	31.1644	33.6591	17.2853	14.5899	19.9432	9.66154	11.408	11.2556
evm.TU.contig459.105	9.74106	20.0847	13.0894	17.0122	6.53887	12.8821	12.5131	11.3523	10.7721
evm.TU.contig497.1	27.7663	22.6297	25.4126	11.8661	10.4954	13.1994	10.6716	12.6433	10.7631
evm.TU.contig524.8	1.47198	2.06934	1.0258	4.61467	26.3564	7.58678	12.1985	11.9916	10.6744
evm.TU.contig600.166	207.423	160.715	166.387	2.37763	6.74106	7.04391	6.28604	9.76346	10.593
evm.TU.contig580.119	0.361793	0.563389	0.349101	3.7476	4.3905	4.56937	6.53998	6.0237	10.5761
evm.TU.contig323.25	0	0	0.303122	4.85674	11.1396	7.83713	8.07934	7.91748	10.5582
evm.TU.contig289.10	21.9084	25.2859	23.7899	13.4215	9.00516	12.3302	10.9026	13.0194	10.5359
evm.TU.contig493.45	20.6909	22.5637	22.2902	6.68037	2.3573	6.7374	10.2582	7.80603	10.5218
evm.TU.contig579.159	5.18242	8.67836	8.67754	8.01218	24.2626	12.6556	10.6964	13.6203	10.3054
evm.TU.contig34.129	156.875	117.263	184.907	25.6019	13.2104	26.2456	7.01064	4.68422	10.1204
evm.TU.contig139.232	4.39313	4.34043	4.6886	11.7829	7.18593	8.61426	13.8419	16.2677	10.0931
evm.TU.contig549.28	0	0	0	1.07636	21.4647	3.0531	8.63304	4.65257	9.86307
evm.TU.contig591.33	8.70807	9.42127	8.44166	4.47721	6.73439	6.47318	9.37508	8.10459	9.59226
evm.TU.contig205.54	19.4424	20.1164	19.5889	16.3094	12.711	18.2657	9.01368	11.4764	9.5398
evm.TU.contig370.251	2.87608	3.04258	3.49914	21.7492	14.8793	20.3751	8.5455	11.5559	9.48069
evm.TU.contig340.14	1.61479	1.27225	1.13769	2.69464	2.98929	2.27803	6.57326	5.91191	9.15558
evm.TU.contig522.785	0	0	0	0	0	0	2.70411	1.68632	8.9166
evm.TU.contig168.8	15.0381	19.7856	13.2341	19.2668	12.9474	15.4691	11.9711	13.9311	8.86996
evm.TU.contig419.8	12.1158	14.1289	15.4823	12.6141	11.4397	14.4238	9.74509	8.54474	8.48881
evm.TU.contig509.208	9.51426	9.13384	8.68086	7.30463	10.3535	8.07343	10.5107	9.44142	8.39771
evm.TU.contig509.182	3.25444	2.41582	2.87414	5.79897	4.9552	6.36452	7.62013	9.22601	8.36412
evm.TU.contig579.188	5.54824	4.33918	4.0152	6.20355	4.13786	4.86618	6.62506	6.6588	8.36346
evm.TU.contig116.95	4.64031	8.10604	5.68301	6.39227	5.90685	5.05545	7.47532	7.7241	8.2304
evm.TU.contig522.1357	8.63205	9.59665	9.67902	13.7674	8.57663	13.1668	11.0815	11.5176	8.16037
evm.TU.contig357.357	160.199	69.814	104.595	7.4854	6.59345	14.439	7.25371	9.40606	8.15658
evm.TU.contig432.92	1.76302	1.62055	1.51215	1.74141	8.56723	5.87971	6.33357	7.18129	8.03839
evm.TU.contig126.173	0	0	0	1.99126	19.5546	4.01653	7.25602	2.88548	7.85236
evm.TU.contig357.65	5.37953	6.34322	7.08745	5.75787	8.2337	8.46859	8.05802	7.19	7.60088
evm.TU.contig184.281	0	0	0	2.21251	13.1985	3.30579	4.82955	2.34789	7.53999
evm.TU.contig511.10	2.56248	3.47841	3.64381	6.20315	8.98042	5.62524	7.18499	6.33474	7.53717
evm.TU.contig449.20	12.8798	13.4308	13.3157	6.82719	10.5844	7.88961	9.32916	4.77791	7.47844
evm.TU.contig206.295	18.9727	18.5854	19.9146	11.4945	8.99473	12.0255	7.86619	8.45853	7.28209
evm.TU.contig206.302	10.7232	10.2324	10.3759	7.24727	8.66245	8.64021	6.75712	8.05251	7.18746
evm.TU.contig206.214	1.2393	1.37847	1.87915	4.31098	8.23118	9.04064	5.9193	4.66491	7.05737
evm.TU.contig127.87	3.71259	5.22541	5.12552	5.20996	5.31103	4.76462	6.4215	5.88903	6.83047
evm.TU.contig197.89	3.47642	2.99519	3.0795	6.78439	8.08364	7.24219	6.15603	9.14045	6.81536
evm.TU.contig528.1	6.51677	7.24002	8.12714	5.22766	5.42597	4.93679	5.55665	5.44667	6.77549
evm.TU.contig195.95	0.489108	0	0.314633	2.01647	2.44101	2.2879	5.03169	5.10521	6.7539
evm.TU.contig300.288	0.193198	0.188031	0	1.49345	1.52242	1.5062	4.68486	2.2133	6.64431
evm.TU.contig515.64	0.089755	0.436774	0	8.11769	5.51678	10.916	6.39752	9.59694	6.52434
evm.TU.contig37.30	10.4124	8.35694	7.9044	4.92094	9.4495	7.002	5.6206	4.89959	6.51856
evm.TU.contig64.414	4.76656	6.36641	5.0397	3.25344	3.79606	5.37646	7.86213	6.39009	6.38113
evm.TU.contig509.149	8.6939	4.07401	9.321	40.3231	0.507473	14.5599	11.3572	19.1819	6.29195
evm.TU.contig305.435	1.6709	4.33658	2.68713	7.26542	3.4563	7.81595	7.41802	8.29487	6.25795
evm.TU.contig507.192	5.38612	6.95146	5.53611	6.15481	5.25927	6.29865	5.24842	6.61753	6.22332
evm.TU.contig580.231	0.705101	3.01948	0.952511	10.7921	16.1132	14.5123	4.87035	5.70826	6.17255
evm.TU.contig508.26	4.92896	4.85426	3.96337	4.80806	6.01107	5.94703	6.46768	6.90149	5.77885
evm.TU.contig572.4	6.49554	5.19603	5.452	5.46823	3.26045	5.27213	5.62304	5.84436	5.59865
evm.TU.contig355.1	0.03453	0.100821	0.066638	10.1432	8.46242	11.6835	5.98818	6.67219	5.50588
evm.TU.contig391.4	7.47991	6.22878	7.10171	10.2037	4.91713	8.60685	7.87718	7.79007	5.44
evm.TU.contig552.76	7.51324	9.40156	4.83311	5.94613	11.1362	9.90186	6.30958	5.60155	5.31321
evm.TU.contig412.44	0	0	0.075094	5.59479	20.0536	7.40206	4.57492	3.0313	5.23126
evm.TU.contig184.280	0	0.216128	0	3.77653	14.8742	4.15503	7.01669	5.59684	5.20714
evm.TU.contig20.2	7.53181	5.59539	4.9884	4.34082	3.02026	4.51686	4.19183	4.69719	5.08582
evm.TU.contig507.9	5.68084	6.62518	7.08821	5.52708	5.98162	5.72699	4.49827	4.71272	4.78476
evm.TU.contig273.87	7.07275	19.5639	16.3072	9.2657	5.69074	8.88048	4.21246	3.35477	4.65532
evm.TU.contig588.2	0.936716	1.45867	1.35578	1.59301	3.39546	3.43231	2.47794	2.14623	4.53936
evm.TU.contig358.85	0	0	0	3.99852	3.34239	4.11331	4.44711	5.13571	4.52819
evm.TU.contig144.10	5.07334	5.00721	4.06797	4.25318	2.59015	6.40639	4.2268	4.47502	4.41222
evm.TU.contig106.33	10.387	9.74527	10.4235	7.676	4.09253	7.5148	3.41939	4.75978	4.38407
evm.TU.contig195.156	2.78637	2.54582	2.46914	2.28578	3.04708	2.92595	4.97245	3.12695	4.04463
evm.TU.contig559.3	5.32225	4.35114	5.20401	6.52783	6.03935	6.14098	3.70232	3.73964	3.93811
evm.TU.contig363.50	13.421	14.9582	11.9058	12.7173	6.82317	12.6571	3.49943	2.64521	3.89149
evm.TU.contig566.14	0.083635	0.325595	0.161403	4.00839	3.36119	3.7818	3.9947	4.4713	3.79152
evm.TU.contig126.208	22.8617	5.95432	10.5638	0.248908	0.169158	1.17149	2.20835	1.72145	3.60739
evm.TU.contig480.21	4.07268	0.792753	0.687715	0	0.160466	0.079378	4.26458	6.29871	3.50161
evm.TU.contig507.256	1.869	3.71713	4.07732	3.14079	3.26576	2.34403	1.01511	1.05506	3.42981
evm.TU.contig452.23	2.35517	2.57871	2.60396	2.04816	3.86646	3.06021	3.28098	3.18527	3.29818
evm.TU.contig36.25	6.824	6.57196	5.61932	6.32454	3.294	10.0274	4.01678	4.3113	3.21143
evm.TU.contig535.20	9.87778	5.46657	7.38204	2.17092	3.66296	3.54844	2.49062	1.84903	3.17909
evm.TU.contig507.193	3.93551	8.35694	5.69616	5.53128	3.66508	3.48657	4.46929	5.19168	3.07607
evm.TU.contig136.15	7.53123	7.56327	8.93334	2.70693	3.02405	2.13168	2.67893	3.07746	3.03701
evm.TU.contig193.512	7.18149	9.39016	8.28533	3.74116	3.96137	3.06717	2.59266	3.26703	2.97743
evm.TU.contig414.18	4.90203	2.1516	2.22591	0.148602	0.605938	0.599482	2.26015	1.61501	2.85486
evm.TU.contig155.238	66.6598	27.1174	46.2626	0.568932	0.745675	1.06561	2.24054	4.41655	2.5476
evm.TU.contig289.20	0.843044	0.911666	0.542313	0	0	0.073028	3.0286	2.50393	2.48933
evm.TU.contig269.127	4.00706	2.22852	2.96891	4.25909	7.2174	8.81405	3.20737	5.02773	2.349
evm.TU.contig273.88	3.55306	9.50962	7.14253	0.915523	2.33321	1.84668	1.523	3.16589	2.31428
evm.TU.contig222.145	20.3569	14.0847	23.5527	12.3801	22.0475	14.5919	4.74991	7.88423	2.26228
evm.TU.contig455.602	0.774198	0.410997	0.475388	1.03372	1.27562	1.53638	0.982639	1.66636	2.09044
evm.TU.contig336.28	0.081518	0	0	0.378088	0.578134	0.635527	0.359406	0.311293	2.03891
evm.TU.contig269.124	0.423679	0.659759	0.694987	0.294759	0.300478	0.429399	2.0859	2.32978	2.02005
evm.TU.contig490.9	1.28264	1.56042	2.16588	3.305	1.93724	3.58321	3.92712	2.53065	2.00507
evm.TU.contig505.6	0	0	0.264425	0.635509	0.215946	0.854581	0.604109	1.25577	1.92775
evm.TU.contig357.655	0.785889	1.14731	0.926834	1.41751	1.30739	1.22538	1.57205	1.4005	1.80867
evm.TU.contig507.226	0.858656	0.94712	1.38089	2.30102	1.44348	1.29421	1.68255	1.39902	1.74497
evm.TU.contig369.107	0	0	0.118362	0.094822	0.483308	0.382527	0.630958	1.31158	1.72579
evm.TU.contig66.36	47.8394	95.9343	71.778	0.20319	0.621396	0.8197	1.9315	1.60602	1.64361
evm.TU.contig369.134	0.161503	0.078592	0.155837	0.436954	1.78172	1.2591	1.24609	1.23346	1.45169
evm.TU.contig206.120	0.026502	0	0	0.225349	0.187953	0.18595	1.81108	1.599	1.45
evm.TU.contig357.401	0	0.358155	0	0.853398	2.60986	1.817	0.721095	0.936845	1.43816
evm.TU.contig271.23	1.25317	0.271036	0.40307	0.215272	1.64586	0.542774	1.53476	2.12689	1.41484
evm.TU.contig148.10	9.20728	8.28982	8.81772	1.83932	2.22826	2.50025	1.54572	1.68557	1.34767
evm.TU.contig432.175	0.19714	0.895387	0.443857	2.69227	0.621396	2.25418	0.724314	1.10414	1.28407
evm.TU.contig480.159	0.732503	0.712915	1.41361	1.50996	0.962034	1.14214	1.25594	1.67833	1.2405
evm.TU.contig280.45	0.24533	0	0	0.094822	0	0	0.180274	0.374738	1.15053
evm.TU.contig301.1	0.363381	0.471552	1.0519	0.327716	0.954495	0.519379	0.667549	0.185019	1.1361
evm.TU.contig184.21	3.86395	3.85016	3.55086	4.12476	1.52242	5.16411	1.41965	0.983687	1.00671
evm.TU.contig62.199	0.589274	0.081931	0.081229	0.585665	0.265345	0.590666	0.371152	1.15728	0.986973
evm.TU.contig220.16	0	0	0	0	0	0	0	0.951955	0.974238
evm.TU.contig61.50	1.10489	0.98317	0.852902	1.00051	0.621903	1.52589	1.22944	1.30194	0.91295
evm.TU.contig458.61	0	0	0.350084	0.701149	1.00065	0.848563	0.666505	0.277095	0.850743
evm.TU.contig339.62	0	0	0.161403	0.517211	2.10898	0.847644	0.184371	0.191627	0.849823
evm.TU.contig193.422	0.986961	1.05662	1.80944	2.74657	1.78879	2.69307	1.01534	1.13067	0.84857
evm.TU.contig106.76	170.09	197.556	165.28	11.3717	1.19405	5.16833	0.835091	1.25372	0.789579
evm.TU.contig515.162	0	0	0.391433	0	0	0	0.29809	0.619645	0.63415
evm.TU.contig80.29	1.56398	2.14893	1.8642	1.42233	0.289985	2.43861	0.338013	0.63237	0.575264
evm.TU.contig586.14	0	0.2152	0	0.256386	0.08712	0.086192	0	0.168873	0.518479
evm.TU.contig455.61	0.318021	0.619033	0.306864	0	0	0	0	0	0.497142
evm.TU.contig606.71	0	0	0.613728	0	0	0.743802	2.33688	1.45731	0.497142
evm.TU.contig522.930	0	0	0	0.377491	0.28861	0.571071	0.179419	0.279721	0.477115
evm.TU.contig44.4	0.202832	0	0	0.313585	0.319668	0.158131	0.745226	0.309823	0.475612
evm.TU.contig593.230	0.075542	0	0	0.175184	0.833387	0.883401	0.444076	0.807719	0.472358
evm.TU.contig61.193	0.599797	0.399413	1.24889	0.488055	0.64678	1.03367	0.46394	0.650969	0.468812
evm.TU.contig220.20	0	0	0	1.1444	0.699963	0.230835	1.523	0.678405	0.462856
evm.TU.contig62.54	0	0.093548	0	0.743008	8.40739	7.04391	1.69511	2.86297	0.450767
evm.TU.contig512.6	1.8367	1.20662	0.930438	1.20683	1.59207	0.322182	1.58583	1.36769	0.430679
evm.TU.contig357.4	0.357773	0.174103	1.03567	1.10626	0.563859	3.06818	0.525798	0.409869	0.419464
evm.TU.contig531.51	0.238516	0.154758	0.076716	0.245835	0.250604	0.681818	0.701064	0.182164	0.372857
evm.TU.contig425.4	0.118164	0	0	0.274027	0.744915	0.092122	0.520974	0.090246	0.369436
evm.TU.contig56.97	0.156119	0.911666	0	9.89597	3.19862	7.78963	0.917757	1.43082	0.366077
evm.TU.contig522.636	0	0	0	0	0	0	0.384991	0.200072	0.341259
evm.TU.contig106.115	0	0.10233	0.304359	0.162552	2.07132	1.31152	1.9315	1.68632	0.328723
evm.TU.contig552.12	0	0	0	0.32431	1.12404	0.065416	0.308286	0.320419	0.327919
evm.TU.contig174.31	0	0.099094	0	0	0.080233	0	0.074817	0.155524	0.318328
evm.TU.contig193.167	1.53218	0.3728	1.10882	0.222074	0	0	1.05551	0.658229	0.299394
evm.TU.contig336.117	0.175236	0	0	0.06773	0.207132	0.068308	0.901368	0.468422	0.273935
evm.TU.contig527.160	9.12629	7.16309	9.65833	0.113786	2.08789	0.688548	0.432657	0.449685	0.230106
evm.TU.contig522.1294	0	0	0	0.22714	0.463093	0.22908	0.431834	0.523636	0.229668
evm.TU.contig260.3	0	0	0	0.074579	0	0.150432	0.354471	0.073684	0.226228
evm.TU.contig184.25	0.143109	0.208924	0.552355	0	0.620245	0.11157	0.05258	0.054649	0.223714
evm.TU.contig369.159	6.52264	5.10617	4.74316	0.511517	0.186229	0.552733	0.069463	0.469282	0.221662
evm.TU.contig505.2	0	0	0	0	0	0	0.20137	0	0.214194
evm.TU.contig271.24	0	0	0	0.137328	0.139993	0.692505	0.065272	0.203521	0.208285
evm.TU.contig357.324	0	0	0	0	0.139034	0.068776	0.388947	0.067376	0.206859
evm.TU.contig62.253	0.081005	0.078839	0.156327	0	0.255332	0.126306	0.476195	0.804272	0.189946
evm.TU.contig88.33	0	0	0	0.085097	0	0	0	0	0.172088
evm.TU.contig579.14	0	0.693659	0.39298	0	0.160466	0.079378	0.074817	0.077762	0.159164
evm.TU.contig91.43	0	0	0	0.314824	0.160466	1.03191	0.598537	1.94405	0.159164
evm.TU.contig93.31	0.172306	0.083849	0.332522	0.332987	0.067889	0.33583	0.253227	0.328992	0.134677
evm.TU.contig579.60	0	0	0	0	0	0.535537	0.378575	0	0.134228
evm.TU.contig317.162	0	0.303889	0.301285	0	0	0.121713	0	0	0.122026
evm.TU.contig150.3	0	0	0	0	0.077036	0	0	0.037332	0.114616
evm.TU.contig217.145	0	0.262522	0	0.521273	0.850217	0.105145	0.198207	0	0.105415
evm.TU.contig94.43	0	0	0	0.102116	0	0	0.09707	0.403564	0.103253
evm.TU.contig178.45	0	0	0.061985	0.19863	0.556828	0.150244	0	0.049062	0.10042
evm.TU.contig289.37	0	0	0	0	0.734803	0.181743	0	0.267064	0.091105
evm.TU.contig601.6	0	0	0	0	0.173495	0.429116	0.080892	0	0.086044
evm.TU.contig370.50	0	0	0	0	0	0	0	0.07233	0.074023
evm.TU.contig233.153	0	0	0	0	0	0.352327	0	0.138061	0.070647
evm.TU.contig107.18	2.29367	0.343436	0.680986	0	0.069517	0.343881	0.388947	0.471631	0.068953
evm.TU.contig273.10	0	0	0	0	0	0	0	0	0.062143
evm.TU.contig370.262	0	0	0	0	0	0	0.056168	0.116758	0.059746
evm.TU.contig106.140	0	0	0	0	0.059879	0.118482	0.111674	0.116069	0.059393
evm.TU.contig36.39	0	0	0	0	0	0	0	0.227442	0.058191
evm.TU.contig239.137	0.143109	0	0	0	0	0.167355	0	0.054649	0.055928
evm.TU.contig233.322	0	0	0	0	0	0	0.282518	0	0
evm.TU.contig598.14	0.355306	0	0	0	0	0	0	0.135681	0
evm.TU.contig119.1	0	0	0	0	0.327402	0	0.305302	0.317318	0
evm.TU.contig493.25	0	0	0	0	0.070975	0	0	0	0
evm.TU.contig204.3	0.202832	0	0	0.156792	0.079917	0.237197	0.074523	0.154911	0
evm.TU.contig233.149	0	0	0	0	0	0.207038	0.292712	0.101411	0
evm.TU.contig370.419	2.57597	3.62134	1.93324	0.442503	0	0.223141	0	0.218597	0
evm.TU.contig369.105	0	0	0	0	0.06612	0	0	0	0
evm.TU.contig37.26	0	0	0	0	0	0	0.182007	0.567512	0
evm.TU.contig487.7	0.070574	0	0.068099	0	0	0.055021	0	0	0
evm.TU.contig263.6	0.525708	0	0	0	0.207132	0	0	0.602257	0
evm.TU.contig280.113	0	0.129901	0	0	0	0.104055	0.392305	0	0
evm.TU.contig34.109	0	0.093898	0	0	0.228078	0.075216	0.283577	0.073684	0
evm.TU.contig545.39	0.071159	0.069256	0.274652	0.055007	0	0	0	0	0
evm.TU.contig273.244	8.58656	10.4998	5.736	0	0	0	0	0	0
evm.TU.contig369.115	0	0	0	0	0.371775	0.073563	0	0	0
evm.TU.contig217.106	0	0	0	0	0	0.059948	0	0	0
evm.TU.contig252.34	0.262854	0.255825	0.253633	0.101595	0	0.102462	0	0	0
evm.TU.contig522.1101	0	0.078839	0	0	0	0	0	0	0
evm.TU.contig336.122	0	0	0	0	0.110923	0.109741	0	0	0
evm.TU.contig468.37	0	0.155719	0	0	0	0	0	0	0
evm.TU.contig600.47	0	0.063151	0	0	0	0	0	0	0
evm.TU.contig522.1177	0	0	0	0	0	0.110954	0	0	0
evm.TU.contig155.35	0	0	0.552355	0	0	0	0	0	0
evm.TU.contig450.123	8.99959	10.79	7.61411	0	0	0	0.047921	0.099614	0
evm.TU.contig232.72	0.127523	0	0	0	0	0	0	0	0
evm.TU.contig407.4	0	0	0	0	0	0.331945	0	0	0
evm.TU.contig559.186	0	0	0	0.214884	0.073018	0.650158	0	0	0
evm.TU.contig348.10	2.36192	5.53139	3.48981	0	0	0	0	0	0
evm.TU.contig392.6	0	0	0	0	0	0.098444	0	0	0
evm.TU.contig487.48	0	0	0	0	0	0	0.081239	0	0
evm.TU.contig214.15	0	0	0	0.332987	0	0.268664	0	0	0
evm.TU.contig127.72	0	0.109004	0	0	0	0	0	0	0
evm.TU.contig579.151	0	0.157678	0	0	0	0	0	0	0
evm.TU.contig340.8	0	0	0	0.064442	0	0	0	0	0
evm.TU.contig168.464	0	0	0	0.066821	0	0	0	0	0
evm.TU.contig220.12	0	0	0	0.252059	0.128474	0	0	0	0
evm.TU.contig412.4	0	0.102749	0	0.081609	0.083192	0.41153	0.310307	0.08063	0
evm.TU.contig600.102	0	0	0	0.115771	0.236034	0	0	0	0
evm.TU.contig46.3	0	0	0	0	0.241654	0.478158	0	0	0
evm.TU.contig75.120	1.49331	0.545018	3.06197	1.73153	0	0.291053	0.685824	0.285127	0
evm.TU.contig232.59	1.76436	0	0.340493	2.18221	0.278067	1.37552	0.259298	0	0
evm.TU.contig103.5	0	0	0.108541	0	0	0	0	0	0
name	Flower01	Flower02	Flower03	Leaf01	Leaf02	Leaf03	Root01	Root02	Root03	Stem01	Stem02	Stem03
evm.TU.contig357.421	1061.53	1231.13	333.933	519.869	1667.87	535.997	259.246	226.46	288.451	697.133	589.88	828.982
evm.TU.contig57.4	900.297	731.152	94.6835	139.717	894.715	128.125	198.988	165.047	655.878	563.373	618.79	621.822
evm.TU.contig106.147	35.6474	24.1785	26.4311	303.238	133.727	267.89	116.424	163.945	109.638	566.007	682.326	612.094
evm.TU.contig205.137	339.709	455.421	245.228	131.912	275.082	165.224	62.1873	52.9019	70.2899	356.05	372.088	370.493
evm.TU.contig81.1	154.28	168.412	72.3781	146.422	254.405	144.662	108.67	121.958	152.498	369.817	315.058	326.977
evm.TU.contig333.3	291.057	313.655	283.501	180.919	142.815	173.594	247.397	262.121	234.576	294.794	294.004	291.636
evm.TU.contig195.147	29.302	44.6579	60.2602	13.8114	5.12342	15.8714	73.653	63.8181	64.9717	237.989	198.915	221.31
evm.TU.contig305.427	203.987	178.313	30.8238	21.5834	135.246	25.274	71.163	48.458	264.029	183.958	209.961	209.481
evm.TU.contig205.28	11.1497	8.2008	9.22281	16.8574	20.171	16.7993	58.136	61.7859	53.0921	187.523	205.937	189.219
evm.TU.contig433.81	18.4418	19.2143	21.9038	208.552	156.693	251.821	33.0963	45.773	32.4418	167.432	166.176	153.153
evm.TU.contig591.29	75.2424	67.5479	32.1544	285.263	363.743	204.313	83.8709	69.5782	158.133	188.942	137.064	133.815
evm.TU.contig289.147	19.4536	29.5369	22.9782	2.28692	3.10312	1.82886	15.9449	12.4751	17.3177	122.881	135.68	133.732
evm.TU.contig369.119	19.0506	21.3773	13.8117	56.6191	72.4568	58.9016	7.93662	8.84386	8.16698	119.469	134.185	127.344
evm.TU.contig587.35	58.5119	58.9241	39.5843	110.241	248.084	189.965	2.35981	2.98923	0.880595	161.33	100.279	123.523
evm.TU.contig455.337	23.0363	23.5944	14.861	23.0389	44.9785	27.9285	6.26505	4.717	9.73373	119.854	111.002	117.771
evm.TU.contig583.92	20.4411	17.9592	7.67698	34.691	71.8255	42.6023	27.2878	18.9775	41.6324	131.501	97.4309	117.731
evm.TU.contig507.256	93.7029	82.4643	35.9827	83.7001	160.351	85.6723	38.8827	31.9952	45.567	96.978	107.519	108.682
evm.TU.contig139.181	98.3736	81.8093	53.4309	267.531	222.561	181.794	177.036	179.793	173.28	95.2022	121.348	105.511
evm.TU.contig168.306	30.0658	33.3966	29.917	183.453	121.97	114.212	737.413	676.348	631.092	86.5121	146.141	99.3907
evm.TU.contig206.177	28.716	35.1284	82.7487	75.4135	26.2665	77.1792	143.049	151.399	136.043	99.9477	98.1074	95.1233
evm.TU.contig317.76	26.4302	19.3586	18.0598	22.6341	35.4241	27.7897	10.2234	16.4446	10.7509	85.543	76.7849	87.9983
evm.TU.contig300.267	397.948	409.783	302.205	83.5426	165.651	101.596	531.061	508.13	442.104	93.3647	113.084	86.7418
evm.TU.contig139.149	34.6065	24.736	2.1175	38.8737	234.904	28.0749	36.6614	25.6283	171.32	84.1683	96.5121	86.7154
evm.TU.contig195.212	193.784	195.199	126.344	93.9467	116.111	96.7127	130.682	142.68	119.106	78.2096	91.1864	85.7446
evm.TU.contig480.35	121.135	205.042	60.4665	174.318	309.906	115.799	164.512	113.886	162.219	71.47	109.692	84.7091
evm.TU.contig215.18	281.044	299.221	93.347	44.6692	116.317	40.719	123.399	102.277	102.28	92.0397	76.5807	84.5263
evm.TU.contig583.171	88.4794	91.0891	61.3404	39.678	45.1357	40.9316	36.4486	29.4675	39.8517	91.6511	81.2552	80.0038
evm.TU.contig522.838	161.168	165.147	115.847	160.357	273.462	207.28	25.083	31.6952	24.9203	92.2261	74.1522	76.8214
evm.TU.contig197.89	13.7735	13.899	8.81457	13.167	21.7405	17.4322	1.17804	1.09237	1.23088	67.9226	63.7049	76.1772
evm.TU.contig370.138	127.871	140.58	42.6704	35.7724	102.439	31.0734	193.657	171.654	257.719	66.9685	79.5134	75.5324
evm.TU.contig507.450	27.5041	28.2785	41.9329	31.7745	56.2636	38.8663	11.489	11.7964	10.492	65.8086	59.1178	74.593
evm.TU.contig522.251	97.7377	122.063	78.2457	22.8725	31.2234	24.8326	11.3562	7.77435	7.57492	86.1936	77.929	73.3744
evm.TU.contig522.341	8.27848	4.87546	2.00421	19.7254	54.7113	18.0689	0	0	0	93.6108	65.7199	67.1826
evm.TU.contig64.422	103.714	126.231	86.2332	39.8094	69.1578	39.9983	106.251	98.844	128.938	57.4118	74.784	66.1285
evm.TU.contig580.151	57.432	66.2107	91.0093	92.3485	49.4867	73.2962	156.853	163.148	145.679	69.5866	61.4978	64.5084
evm.TU.contig126.173	0	0	0	0	0.159395	0.068219	0.657376	0.274306	0.618177	49.0506	42.8914	64.1875
evm.TU.contig126.148	64.7975	73.1595	81.9397	100.057	72.8124	95.2821	35.417	37.4979	32.2047	62.4137	60.206	63.907
evm.TU.contig273.217	22.4215	19.7647	3.47858	27.4685	161.531	28.6521	7.09966	8.39376	32.3925	62.7137	53.0907	60.8642
evm.TU.contig45.9	63.2428	93.4256	60.0186	13.6406	24.6125	12.3397	9.51262	9.68139	7.21207	64.7391	57.5726	60.3014
evm.TU.contig312.23	18.7098	16.2523	55.669	52.9424	13.3103	52.325	41.8823	48.7812	48.8594	53.4552	58.2841	57.1931
evm.TU.contig459.153	387.032	422.995	114.845	51.0542	185.142	60.4672	29.4539	36.4034	28.1659	59.3547	46.7116	56.3857
evm.TU.contig76.33	49.1653	68.6274	52.7824	108.571	57.8713	92.4062	73.2078	67.0959	66.0326	73.5945	77.14	54.2865
evm.TU.contig244.196	29.1194	27.0783	45.8181	92.018	70.6411	94.2315	33.8807	38.0855	34.6554	54.1373	52.271	53.3451
evm.TU.contig357.58	106.469	120.852	52.4085	54.9528	163.393	60.2416	2.09661	2.05046	1.91683	68.7695	44.0953	53.2228
evm.TU.contig357.550	0.827021	0.941176	1.13256	0	0	0.081863	1.26216	1.72813	2.22544	40.8254	30.1523	50.4924
evm.TU.contig269.127	15.6343	22.6797	32.3027	43.6244	20.0572	46.7303	4.21816	3.82885	3.03365	51.6921	43.398	48.1853
evm.TU.contig357.464	59.9732	53.5832	43.5508	61.1232	49.0176	51.6173	24.0262	29.3119	28.3255	42.9844	51.8845	47.3754
evm.TU.contig583.170	17.8104	24.5869	47.9475	34.4418	13.9695	23.2252	16.6191	17.7991	21.3005	46.9766	50.5453	47.2022
evm.TU.contig357.426	87.7589	104.017	39.0921	26.5193	83.1723	24.5215	48.1608	51.4324	44.9184	39.2398	43.1838	44.8583
evm.TU.contig455.366	29.1915	35.444	70.5918	19.2708	11.2693	23.0729	21.6055	23.3903	28.9401	47.6469	48.0777	44.8099
evm.TU.contig606.71	32.6157	27.8867	93.8807	49.8846	11.2167	25.7718	14.1214	12.9533	8.395	40.4833	47.7822	43.6751
evm.TU.contig233.73	31.3074	34.0029	52.7188	56.3157	38.8526	60.2119	49.9045	53.6277	44.2273	39.8022	43.9251	41.2427
evm.TU.contig522.1150	52.4747	66.2126	20.0114	6.77458	21.2247	6.46289	48.3691	36.5982	145.254	40.6298	42.0915	40.9767
evm.TU.contig126.220	12.1736	13.9769	12.9643	5.59288	3.83162	5.26951	16.5819	16.0232	17.0615	38.7122	40.2891	40.2868
evm.TU.contig514.31	57.6441	52.9567	59.0187	29.4106	38.5451	34.7217	11.0835	11.6164	10.3301	35.7981	33.5232	39.9357
evm.TU.contig223.8	13.8069	22.5787	24.8207	11.8624	6.39996	11.0598	71.2158	80.3176	83.0481	37.1596	42.2671	39.8964
evm.TU.contig168.691	56.5029	78.8062	23.7189	32.7842	176.595	40.9316	7.17797	8.24431	6.81813	42.1196	32.1834	38.4273
evm.TU.contig34.129	2.18789	4.10831	2.35415	27.9087	14.295	21.7652	27.7559	23.1854	26.4933	46.845	44.387	37.1167
evm.TU.contig273.357	13.8269	19.2513	22.3799	12.9162	5.09665	13.3445	3.09111	3.61155	2.39003	37.3273	33.4128	36.9243
evm.TU.contig591.12	24.9704	32.1228	26.3795	14.7122	23.9093	19.9319	4.45873	5.09851	4.30036	44.5537	31.3646	36.7052
evm.TU.contig388.19	23.0904	25.015	37.2044	20.1425	12.1179	20.8849	53.611	59.9986	45.8886	41.1992	42.5675	35.9133
evm.TU.contig273.40	7.52759	6.152	14.5244	24.8386	14.8164	26.3727	147.324	124.136	130.003	36.0136	41.3874	35.8327
evm.TU.contig62.45	37.4556	42.8389	56.9358	28.5589	23.1296	33.1457	64.6301	68.7629	64.7294	39.8755	37.7741	35.1758
evm.TU.contig34.26	68.0286	80.4474	53.9077	33.2212	65.9189	33.0047	61.1777	71.4982	56.9565	35.5049	36.1035	34.6096
evm.TU.contig39.22	16.5459	18.6274	35.9944	33.1745	12.3816	39.2261	21.9517	19.7157	19.9926	38.0615	33.049	34.4579
evm.TU.contig358.57	23.206	32.8456	23.6635	12.3773	11.8333	13.5054	44.6482	46.2108	47.9061	30.534	33.6356	34.334
evm.TU.contig591.116	41.8546	50.5238	23.5488	30.1297	44.5433	39.8803	2.56647	3.02958	1.90534	40.2173	32.2692	34.0056
evm.TU.contig56.51	38.1175	38.5318	30.818	38.603	52.5354	38.2358	45.0041	51.057	45.5318	30.5456	33.8229	33.0035
evm.TU.contig127.59	22.9728	32.2885	36.6104	57.8253	49.5638	57.2146	27.9265	27.3305	25.2686	40.6902	34.9067	32.865
evm.TU.contig350.30	185.732	158.289	253.417	43.6094	33.5455	43.3503	123.527	121.942	99.3455	36.021	36.843	32.5871
evm.TU.contig39.21	20.5194	16.9046	39.0741	25.5089	20.1952	34.9707	16.0834	18.975	15.2044	37.6067	30.2971	32.3949
evm.TU.contig369.211	33.5177	44.3587	54.5393	29.9386	13.7184	33.5505	18.8322	23.3554	19.9303	39.8974	33.3021	32.2925
evm.TU.contig127.139	42.5104	50.6872	63.13	43.8089	33.0708	46.3828	204.401	201.019	194.986	32.6574	34.7512	32.2171
evm.TU.contig289.82	15.4371	17.4597	40.7706	62.3765	18.5031	57.943	4.58489	2.7518	4.79055	39.8145	31.7507	31.3029
evm.TU.contig522.467	54.2085	82.6784	96.4052	11.0145	8.03276	13.9944	5.45648	4.30975	6.10847	34.1038	35.8819	29.7137
evm.TU.contig378.64	15.5285	18.5613	10.7942	72.439	87.013	66.1388	173.906	165.217	158.291	33.086	32.2376	28.8834
evm.TU.contig459.105	39.2532	43.4338	36.653	5.18525	5.75966	4.24221	6.62901	4.32205	4.84845	31.3448	23.7261	28.4334
evm.TU.contig136.18	117.793	109.435	89.7199	39.5422	60.5755	40.3135	6.81642	6.83464	5.87753	33.0116	22.7796	27.2503
evm.TU.contig336.28	7.05178	19.1363	2.24003	0.881853	0.756623	0.841948	0.249637	0.390626	0.130417	33.92	30.2031	26.7794
evm.TU.contig126.234	46.324	55.3079	39.1638	46.9282	64.0206	45.8916	14.0137	14.0864	14.3999	27.1976	25.3653	26.7691
evm.TU.contig264.5	0.301283	0.462874	0.663092	0	0	0.201303	0.25864	0.202357	0.135121	20.6963	12.2246	26.4272
evm.TU.contig126.208	23.8343	15.3922	4.97181	34.4185	46.922	35.9004	88.6636	69.6909	93.9286	30.5712	27.8625	25.8793
evm.TU.contig48.2	16.0846	20.0019	15.6762	27.9682	35.3873	29.2788	11.512	14.3387	11.6668	28.7318	24.562	25.8389
evm.TU.contig220.16	0	0	0	58.7509	8.86957	81.8632	9.22447	4.97733	5.48383	24.4614	20.4271	25.774
evm.TU.contig549.28	0	0	0.068325	0	0	0	0.199878	0.347516	0.069615	36.4196	20.7428	25.6009
evm.TU.contig507.192	8.66701	9.41176	9.83636	53.6522	24.5614	31.3499	56.2057	47.3178	47.3936	29.7173	44.58	25.5824
evm.TU.contig87.212	2.73804	7.38714	10.6413	5.72838	4.44824	6.06835	14.5617	16.865	11.7406	31.2782	23.6802	24.9503
evm.TU.contig299.57	0	0	0	0	0	0	2.99944	8.21354	4.38757	14.5723	13.6375	24.839
evm.TU.contig432.31	6.00702	5.23799	14.8645	29.3999	15.0383	30.084	16.7248	17.8832	15.145	26.2158	24.2018	24.22
evm.TU.contig370.284	15.0456	16.57	24.8294	38.7347	32.6087	41.316	48.6551	46.7479	41.1634	21.072	24.2117	24.1583
evm.TU.contig206.214	4.10511	6.54942	5.76844	12.0386	6.65516	13.8549	2.84637	3.03999	3.82378	21.692	18.5228	22.7943
evm.TU.contig606.25	7.62563	10.2665	13.1732	24.4757	18.9178	23.4994	24.2502	26.9295	24.1334	26.5276	25.1709	22.7442
evm.TU.contig168.268	11.4595	15.4291	15.6537	19.5551	15.4822	19.2915	18.4281	18.8866	17.5174	21.6466	23.2296	22.7366
evm.TU.contig455.365	19.3274	17.2596	53.5883	39.1538	20.2585	44.6694	21.0793	21.4353	19.6188	29.6989	24.1465	22.3272
evm.TU.contig603.64	11.1135	9.09091	20.6839	0.323128	0.388138	0.53158	18.6328	16.8992	15.053	21.0936	22.6321	21.7972
evm.TU.contig34.123	21.6248	21.6885	27.6415	24.4307	22.214	25.6198	5.11114	6.13668	4.33278	23.9522	19.7187	21.4765
evm.TU.contig204.103	22.4884	17.9305	14.1326	16.1276	18.4361	11.2808	32.255	33.6479	54.2457	23.0256	23.5595	21.3719
evm.TU.contig107.18	295.421	258.259	148.15	153.716	333.584	133.799	0.202616	0.352277	0.070568	20.7052	24.5662	20.72
evm.TU.contig220.21	1.3839	0.85046	2.924	114.152	75.4727	177.535	7.841	3.96587	3.97222	22.4701	19.2871	20.5848
evm.TU.contig37.30	2.94862	2.16362	3.91313	1.14395	0.687048	2.15636	5.78038	5.39942	5.84229	14.841	14.6349	20.5625
evm.TU.contig78.107	36.286	45.6235	40.3164	25.0652	11.6682	20.9117	2.83574	4.57177	3.54655	19.6017	19.0275	20.188
evm.TU.contig206.198	24.1706	27.6043	24.8567	25.094	26.8924	28.1643	12.4865	12.9874	11.6268	20.2275	18.9052	19.9507
evm.TU.contig559.113	49.2585	62.7368	77.8316	22.1466	16.2583	25.0545	8.51129	9.22535	7.2446	21.2066	14.8458	19.8042
evm.TU.contig139.232	31.4614	42.5596	15.4165	2.52023	1.85343	1.69226	2.95565	1.54164	2.60902	15.6226	10.8387	19.5291
evm.TU.contig600.201	11.1246	20.0093	10.988	166.839	168.306	109.5	0.5435	1.05295	0.405628	30.742	20.8221	18.8343
evm.TU.contig600.126	102.727	232.075	87.6704	2.62892	2.14281	0.386147	1.76747	0.582253	2.23555	22.3315	11.6611	18.5834
evm.TU.contig522.89	23.8103	27.0833	40.3433	24.1033	14.9433	24.1966	21.2107	18.3764	20.0693	19.0537	18.3639	18.3207
evm.TU.contig168.735	10.1197	8.45867	18.1763	11.9428	5.81086	11.9686	35.5982	38.4896	33.8041	21.3249	21.2896	17.7088
evm.TU.contig522.1548	0.494039	0.759013	0.326198	1.28417	1.92817	1.98056	8.37625	7.07887	6.53628	18.8419	15.1433	17.3988
evm.TU.contig357.430	61.2608	63.4191	62.4636	26.0731	25.2168	28.2471	9.86064	8.78636	9.28339	17.0255	17.9418	17.1168
evm.TU.contig116.63	14.0031	20.6543	19.6846	18.7026	17.9991	17.9363	11.8549	14.1873	12.5314	14.565	14.9985	16.9668
evm.TU.contig168.634	34.3599	44.4821	8.97563	10.2105	51.4704	11.265	5.11503	3.55728	7.30411	13.1709	15.5919	16.7986
evm.TU.contig317.141	52.673	76.2536	142.096	10.8375	6.22368	13.6735	22.8442	23.2506	19.5331	16.3157	17.4065	16.7431
evm.TU.contig184.281	0.378153	0	0.083228	0	0.393569	0	2.19125	1.10061	1.35677	15.5186	12.842	16.4609
evm.TU.contig507.193	6.54087	7.51634	8.42679	30.4099	21.5848	18.334	26.432	26.2877	20.749	14.6594	20.5451	15.9129
evm.TU.contig522.23	8.90671	10.4204	8.30328	12.4542	13.6974	14.547	20.5916	20.0704	18.4138	15.2135	14.9143	15.8079
evm.TU.contig357.357	77.8057	56.7625	23.841	5.15778	8.81328	3.73464	17.634	15.6174	20.3051	16.9792	16.1222	15.7723
evm.TU.contig193.512	6.85007	7.18716	13.2867	55.0093	35.2988	62.5882	1.91237	1.74558	1.19889	16.4206	14.4916	15.6174
evm.TU.contig509.149	1.72296	5	4.29766	6.22021	3.28753	5.88392	105.509	99.0073	57.9541	13.8339	23.8098	15.3266
evm.TU.contig370.380	9.58192	7.8025	8.6975	2.99086	3.159	2.86309	1.89038	1.11925	2.29548	13.6985	13.4916	15.1534
evm.TU.contig600.166	78.7761	80.5092	14.2627	77.8362	199.75	61.0156	44.8144	34.6977	52.2068	13.0004	9.60254	14.9253
evm.TU.contig94.11	9.33733	13.5104	12.7217	34.6727	29.1539	34.5938	9.09724	9.88829	9.17295	16.0652	14.7075	14.9132
evm.TU.contig522.1422	18.5852	20.1802	23.8319	22.1641	17.9643	24.264	14.9597	15.6799	14.7026	15.4726	12.9979	14.8128
evm.TU.contig134.33	53.1144	60.5757	4.51819	6.35256	82.1564	9.65232	0	0.145907	0.949918	15.6254	10.4911	14.1844
evm.TU.contig317.110	9.74792	12.7822	16.726	8.01567	13.764	10.5648	5.17018	5.28224	5.68055	14.1801	15.9371	14.016
evm.TU.contig206.295	4.92471	7.49559	12.3041	15.2325	9.13421	15.6619	15.9187	17.3453	13.5728	13.2786	13.4929	13.6009
evm.TU.contig509.177	21.8863	19.2369	12.2986	20.3082	17.3665	21.7795	0.399756	0.278013	0.278458	16.9635	9.37878	13.4456
evm.TU.contig244.71	22.2549	34.8856	22.0501	20.2503	22.83	22.3845	15.8866	16.8584	13.8088	14.6594	16.3938	13.4003
evm.TU.contig289.10	10.9515	14.677	14.2016	18.7094	17.8734	18.4343	27.5035	29.0694	23.7372	12.4575	14.8252	12.9569
evm.TU.contig419.8	6.86264	6.0319	11.8261	12.9043	6.07863	12.5743	3.30081	3.79205	2.53208	13.0697	9.27319	12.6905
evm.TU.contig168.474	176.066	164.167	117.589	49.5338	75.8648	56.294	12.4952	15.2334	13.2129	16.6878	15.2622	12.6843
evm.TU.contig412.44	0.138808	0	0.244402	0	0	0.12366	0.297905	0.248616	0.124507	15.727	11.999	12.5097
evm.TU.contig184.280	1.18825	0	0	0	0	0	1.19008	0.177353	0.177637	11.4841	6.28871	12.4762
evm.TU.contig357.429	132.159	131.514	21.3009	7.644	52.7277	8.48203	3.89927	2.81607	4.93602	10.9097	11.7883	12.4577
evm.TU.contig290.16	12.7867	16.6482	9.25357	11.1729	24.1349	12.3567	4.4652	5.14324	6.22065	13.1475	9.74948	11.9465
evm.TU.contig269.27	8.04422	7.35773	15.5141	6.35394	4.82859	8.19966	6.03844	6.03116	4.4635	12.5839	11.881	11.8835
evm.TU.contig370.232	3.47263	4.26813	5.26772	13.2852	14.1788	15.278	13.0252	12.4395	10.9739	11.4389	11.7341	11.8733
evm.TU.contig497.1	9.19359	7.6293	1.24063	1.10474	15.0161	2.27176	0.518476	0.661059	3.67175	10.0578	12.7856	11.8606
evm.TU.contig579.80	79.2083	82.598	78.5798	50.0727	53.2978	68.7523	2.87602	5.35754	3.54164	15.371	16.042	11.83
evm.TU.contig455.602	3.6405	3.53584	3.64701	1.63153	0.522607	1.17427	1.67038	2.41704	2.19571	9.2954	9.57817	11.6429
evm.TU.contig511.10	16.8387	25.87	21.7067	2.44901	3.25467	2.41089	3.97523	3.87762	4.15355	11.3204	10.5031	11.5762
evm.TU.contig522.1231	6.69938	6.18801	7.84952	4.91812	5.42586	5.2738	7.52881	8.68296	6.0747	14.8874	11.2385	11.5743
evm.TU.contig375.41	40.7345	51.1934	6.20298	7.88556	62.2558	8.76172	1.38616	0.920196	2.30417	10.6075	9.64627	11.3667
evm.TU.contig455.612	4.68971	3.48068	3.88929	94.5767	53.7605	112.32	23.8056	14.4863	13.4731	8.12511	11.5107	11.1801
evm.TU.contig450.123	43.7356	70.1712	25.0884	10.4311	31.2334	12.5386	15.3776	13.8542	14.0851	12.0893	11.4913	11.0425
evm.TU.contig75.124	16.9999	14.2521	16.9306	11.0898	10.725	11.227	14.0303	15.6354	14.2475	11.4185	10.4792	11.0265
evm.TU.contig168.8	5.83633	6.86804	7.21516	21.9489	33.6022	26.7162	10.0739	10.3421	6.79438	10.8566	9.25555	10.8108
evm.TU.contig339.62	16.4091	29.1826	11.8851	0.58163	0.853903	0.53158	0	0.066795	0.133805	11.9109	8.94758	10.5723
evm.TU.contig527.160	148.207	128.269	57.7837	18.5398	32.7899	14.5015	1.01424	0.705358	0.235496	9.369	7.06332	10.5671
evm.TU.contig106.33	5.59499	5.5408	1.01121	3.75621	10.2964	3.03686	9.60618	7.6319	24.0956	10.9415	11.8314	10.4717
evm.TU.contig8.96	41.0113	50.1243	44.6501	4.76591	5.97732	6.84596	1.87491	3.18736	7.47327	11.6185	8.49075	10.121
evm.TU.contig522.1692	47.3222	45.5166	28.2534	12.5989	24.6257	14.487	2.9545	4.23787	3.70443	11.8977	8.5001	9.86202
evm.TU.contig591.33	1.30035	0.702923	1.62176	2.66022	1.50373	2.47778	1.70546	1.48798	1.78196	7.73384	7.00943	9.63937
evm.TU.contig299.9	29.1046	33.4365	12.8493	27.2754	82.4241	31.0449	1.4828	1.43083	1.31692	9.0531	9.21767	9.63462
evm.TU.contig317.90	5.96669	5.91962	10.6338	9.40294	6.44793	10.557	4.71169	4.93379	4.06524	8.55027	8.28884	9.44085
evm.TU.contig370.251	2.00733	1.25642	6.47963	111.988	29.3643	114.251	1.72322	1.69777	2.20063	10.8443	10.8204	9.26963
evm.TU.contig509.208	3.52096	3.01507	3.55704	3.85091	3.66449	4.06231	5.54971	5.89276	6.16106	6.53976	8.50258	8.3331
evm.TU.contig206.302	6.01032	7.5513	11.4526	10.9476	6.22753	11.6845	16.4879	15.645	12.9146	7.79275	8.78876	8.15705
evm.TU.contig455.185	16.8194	20.028	11.316	10.9002	13.9471	9.50198	6.2216	4.53095	8.95376	10.1253	9.40812	7.65732
evm.TU.contig391.4	3.24616	4.27475	2.54374	3.64713	7.68513	4.67154	9.92189	13.0657	6.81531	6.81034	7.4258	7.39722
evm.TU.contig116.95	5.72994	7.77068	4.4372	8.04462	12.8657	7.84602	2.55056	2.09055	2.18908	8.37773	5.61579	7.381
evm.TU.contig220.20	1.05622	0	1.85971	86.2536	43.4215	123.501	3.17354	1.41882	0.947398	6.83156	8.15204	7.16223
evm.TU.contig205.55	16.0155	21.9067	6.48876	8.74374	20.6115	11.0153	12.0338	13.047	10.3493	6.60623	7.83811	7.11201
evm.TU.contig363.50	3.08878	2.76817	4.92861	6.35612	11.2514	4.81548	7.62336	7.43392	16.1038	12.4001	10.5575	6.92537
evm.TU.contig36.39	89.3682	69.7042	62.1342	11.2755	16.3772	13.0129	0.170994	0.059459	0.059555	6.51565	6.4422	6.91316
evm.TU.contig522.154	93.337	95.5162	22.9114	0.835162	3.84555	1.00182	13.1705	6.47401	17.2196	7.88257	8.57308	6.88757
evm.TU.contig66.36	0.703249	1.92077	1.03185	5.07773	1.70781	5.42971	35.8203	41.9856	40.1605	4.39172	9.30473	6.76852
evm.TU.contig305.125	8.09832	11.1158	6.40194	7.20769	13.1874	6.62562	12.58	11.1005	11.8595	7.12645	8.11517	6.70015
evm.TU.contig126.366	7.19148	4.05115	3.23589	6.81952	27.6932	6.3711	1.06323	0.429349	0.824236	9.12459	7.33015	6.64189
evm.TU.contig64.14	3.44592	2.19608	10.7863	29.7907	10.4404	40.113	5.71917	9.25783	4.87673	8.53945	4.59309	6.56615
evm.TU.contig587.69	17.6531	20.1507	33.7246	2.18874	3.30957	2.48873	34.7482	38.8571	30.6823	8.56375	5.37393	6.5528
evm.TU.contig106.76	6.02473	6.1707	1.63579	9.02541	22.0926	8.62774	1.01507	0.403391	1.21211	5.3246	4.61892	6.45382
evm.TU.contig357.471	31.0958	41.9889	16.4253	114.699	159.968	73.1568	89.3451	89.6799	91.7589	8.49227	11.4193	6.21893
evm.TU.contig579.64	3.98833	1.87908	3.9325	11.9566	7.05656	8.24317	209.676	252.947	213.071	7.47202	7.24706	6.2116
evm.TU.contig580.231	1.76069	1.03049	2.54649	2.28831	8.1152	3.80933	0.539816	0.225251	0.112806	0.448789	1.22026	6.16218
evm.TU.contig205.54	7.87639	12.8291	6.78959	12.9381	17.9889	15.3006	12.0676	13.4704	13.0504	8.19787	7.47825	6.12585
evm.TU.contig144.10	6.46807	10.6715	5.32957	5.4662	9.98155	8.1182	6.86552	8.64578	6.97343	5.05971	5.7334	6.07753
evm.TU.contig552.12	4.4898	5.74823	6.78535	0.259344	0.545163	0.266656	0	0	0	8.4115	5.0164	5.82717
evm.TU.contig480.149	5.1701	5.19545	7.04201	6.88846	5.27933	8.99453	3.51717	5.0668	3.71869	5.22157	5.89409	5.80395
evm.TU.contig222.145	4.21598	8.37189	1.81791	139.78	298.911	174.304	0	0.154105	0.077176	5.98721	4.78131	5.79676
evm.TU.contig9.4	17.3441	21.9206	3.45715	4.08301	24.7948	3.84827	0.449488	0.351674	0.763182	3.8537	5.369	5.32576
evm.TU.contig301.1	0.810169	0.885119	1.37893	0.140394	0.112426	0.625522	0.185467	0.532059	0.242233	7.17956	4.9071	5.29291
evm.TU.contig452.23	15.9278	17.3894	25.0396	4.09468	2.36816	4.63892	3.64374	3.76191	3.76794	4.72354	5.75101	5.24526
evm.TU.contig558.3	0.159533	0.816993	0.561786	4.56149	1.49433	2.9846	0.82172	0.142868	0	5.69297	2.67367	5.1647
evm.TU.contig559.3	7.02474	5.63928	3.95572	2.57719	4.93994	2.93174	17.9828	15.4155	17.2567	5.98467	5.58227	5.03896
evm.TU.contig340.126	14.1046	16.6955	5.87397	4.97617	9.7571	3.83734	2.75518	2.19344	1.96968	7.38411	3.57594	5.02512
evm.TU.contig480.21	3.26886	2.88305	1.51882	5.34988	4.34714	10.0307	11.3027	9.02608	8.47041	3.72631	6.72785	5.00525
evm.TU.contig358.85	4.7514	4.01606	7.95976	6.67486	6.14536	7.1918	6.33616	7.97305	6.28935	4.81502	5.33039	4.92421
evm.TU.contig271.23	8.56823	7.88553	0.327962	2.79741	4.52338	1.99127	0.426406	0.111205	0.222767	2.99112	4.92899	4.8893
evm.TU.contig509.182	3.04992	3.22459	5.11021	2.17374	1.94551	2.80474	0.168919	0.484588	0.529488	5.35407	3.55807	4.86371
evm.TU.contig357.655	1.20704	0.558325	1.40542	1.85552	0.891533	1.66501	48.6681	45.4348	41.1071	4.23788	9.44491	4.7696
evm.TU.contig289.125	3.60539	5.25506	2.2381	0.120149	0	0.041179	16.7452	19.1242	22.057	6.43294	3.54716	4.69146
evm.TU.contig127.179	1.23069	1.54062	2.70861	11.4926	7.47165	16.5067	4.75424	3.61251	3.92494	5.00168	6.39269	4.66618
evm.TU.contig528.1	13.5424	15.2745	5.21295	7.79085	17.8606	6.20324	5.88344	6.82492	5.31131	4.30437	5.02964	4.60536
evm.TU.contig522.342	1.49823	0.255754	1.97846	56.6851	38.9825	70.2956	0	0	0	5.56921	2.64308	4.58815
evm.TU.contig323.25	0	0	0.246638	0	0	0.249583	0	0	0.753875	3.24916	3.21253	4.4123
evm.TU.contig62.199	31.0058	19.6078	30.0721	8.65138	5.46945	9.63097	0	0	0	2.54509	1.92041	4.07264
evm.TU.contig308.72	2.26567	2.64436	5.47355	10.6828	5.09992	11.4064	5.15648	7.64408	5.67135	6.48685	3.76457	4.05697
evm.TU.contig336.65	0.319067	0.43573	0.280893	0.829362	0.885529	1.70548	0	0	0.190795	4.74414	6.28548	4.00148
evm.TU.contig299.8	16.6335	22.9337	9.57454	4.28329	8.83736	5.5439	6.09113	6.19793	5.47752	4.5659	3.59102	3.91832
evm.TU.contig357.65	4.15171	5.57524	5.27944	4.07686	4.22493	5.34248	5.06893	4.70947	4.05498	3.1277	4.23176	3.87479
evm.TU.contig127.87	4.02406	5.32151	5.06729	4.19278	4.02906	5.44545	3.27959	4.56163	3.24395	3.49909	4.49305	3.8329
evm.TU.contig552.74	0.4786	0.653595	3.08982	2.34986	1.66037	2.84247	4.79337	4.0003	4.86529	3.13113	4.22159	3.76884
evm.TU.contig522.1357	4.13815	5.17335	6.72358	6.35368	4.30684	6.88519	2.08967	1.88018	1.69214	4.23466	3.40858	3.75386
evm.TU.contig579.188	2.65071	2.26244	4.9005	4.44028	2.39093	4.09316	1.74458	1.42428	0.951042	3.0742	3.19542	3.63354
evm.TU.contig136.15	3.42239	3.50531	4.36875	4.00318	4.27429	4.80203	3.48887	3.83109	4.2977	3.66385	3.28294	3.59338
evm.TU.contig340.14	1.00577	1.7091	2.41484	1.50523	1.40363	1.07929	1.70722	1.392	1.25071	5.20014	3.89142	3.58008
evm.TU.contig535.20	142.673	177.267	71.3173	1.64625	4.49423	1.23103	0.518981	0.232026	0.077466	3.46714	1.98066	3.40045
evm.TU.contig273.384	8.71922	7.43315	7.35429	0.090476	0	0.093026	54.5473	56.8094	56.9472	4.33183	1.93426	3.38053
evm.TU.contig193.422	3.87281	3.33559	1.78222	25.7007	58.903	30.5027	1.66233	0.788236	1.34215	3.84766	3.49373	3.31157
evm.TU.contig507.9	2.14005	5.23373	5.11375	5.10862	4.59095	6.26425	2.28707	2.22939	1.76286	4.48078	3.69831	3.24817
evm.TU.contig490.9	3.71759	3.9053	19.3851	9.49809	2.08338	3.7365	2.29127	1.10974	1.45353	2.63625	1.76571	3.08596
evm.TU.contig552.76	2.71207	2.61438	5.75831	3.17922	1.99244	3.97946	5.75204	5.71471	7.58412	4.26973	5.06591	3.0709
evm.TU.contig155.238	44.7266	37.8391	25.5074	0.974923	1.07348	1.08594	1.20743	0.587799	1.59801	2.17495	1.32334	3.03558
evm.TU.contig184.21	0.164091	0.756302	3.10587	2.06156	0.683122	2.48513	5.98682	7.71486	5.81381	2.85462	2.24347	2.94328
evm.TU.contig195.156	3.34703	4.67472	3.88414	1.53789	1.63618	1.71678	1.95907	1.90743	2.36536	3.48364	3.66803	2.92854
evm.TU.contig572.4	31.1859	25.0737	3.49297	2.02828	20.9361	2.47428	0.068122	0.106596	0.28471	2.47777	3.35977	2.81198
evm.TU.contig449.20	5.57911	8.73949	3.46702	0.568705	2.04937	0.877106	0.140866	0.440849	0.29437	2.63503	1.73688	2.44077
evm.TU.contig508.26	1.77921	4.01983	2.21131	2.9925	2.83208	4.05587	1.57231	2.10885	2.01835	2.56767	3.04647	2.38092
evm.TU.contig148.10	2.06048	1.57493	2.78863	0.479631	0.256057	0.383563	0.448811	0.440652	0.331019	2.22232	1.65473	2.36793
evm.TU.contig432.92	0	0	0	0	0.363639	0.466901	2.77448	3.28541	3.13398	2.80536	2.69668	2.29283
evm.TU.contig36.25	1.87988	1.9907	2.27208	1.87728	2.55342	2.35598	2.68056	2.85339	3.17234	2.47301	1.7425	2.11877
evm.TU.contig432.175	27.2509	28.6915	20.7918	50.2187	81.5477	49.4416	0.553404	0.419856	0.420529	3.65977	2.01602	2.05107
evm.TU.contig579.159	3.73818	3.13261	4.90649	1.06001	1.41475	1.33209	0.758511	1.21733	0.853499	1.69778	1.55874	1.903
evm.TU.contig579.14	0.090802	0	0.079938	0.708072	0.283509	0.161785	0.07795	0.162632	0.325785	2.02517	1.92224	1.66842
evm.TU.contig273.87	0.265581	0.136008	0.35071	1.20809	0.414612	2.01109	2.62191	3.03243	1.78664	1.5993	1.81553	1.62663
evm.TU.contig369.134	1.65635	0.737599	0.950986	1.31034	3.82249	0.705718	0.5564	0.257968	0.516763	1.79891	1.96919	1.57527
evm.TU.contig370.419	0	0	0.224714	0.884653	0	0.227398	0.876502	0	0	1.59403	0.225152	1.56337
evm.TU.contig69.12	0	0	0	2.99934	0	5.60707	174.79	195.866	156.097	1.40375	1.94309	1.37674
evm.TU.contig355.1	1.50894	1.10393	1.89772	0.266819	0.1282	0.411511	0.449413	0.220621	0.055244	2.1154	1.08652	1.29333
evm.TU.contig493.25	6.42596	3.3731	8.20286	21.1574	13.961	32.2015	0	0.071933	0.144097	2.57975	1.34619	1.26506
evm.TU.contig20.2	13.4339	10.4213	2.02943	0.895366	8.19038	2.54937	0.13648	0.035593	0.178252	1.17011	1.64773	1.25193
evm.TU.contig357.324	4.48442	4.19017	2.42415	0.136333	0.327524	0.42053	0	0	0.211705	1.33356	0.832752	1.17023
evm.TU.contig493.45	0.222317	0.227704	0.326198	0.064209	0	0.264075	5.28022	5.90643	7.44472	2.11558	1.5688	1.16712
evm.TU.contig273.244	0	1.00553	0.172857	0.510377	1.83918	1.04953	0.168558	0.351674	0.352238	0.350336	1.73194	1.03079
evm.TU.contig244.164	0.190646	0.097632	0.251755	0.578144	0.099209	0.679363	0.73648	0.426825	0.427509	0.425201	1.09306	1.00085
evm.TU.contig515.162	0.542664	0.741084	1.59246	1.25384	1.5061	0.966889	0	0	0.162251	0.484126	0.638225	0.949628
evm.TU.contig601.6	2.55253	1.30719	1.21	0	0	0	0.252837	0.879186	0.264178	0.875841	1.55874	0.944893
evm.TU.contig305.435	3.97367	2.48013	5.30205	2.31325	1.42163	2.15721	0.533008	0.556026	0.278458	2.21564	1.36916	0.923535
evm.TU.contig583.20	37.8807	33.7922	18.9334	0.211752	3.56096	0.653164	0	0	0	3.0524	0.431141	0.855339
evm.TU.contig62.172	14.9143	11.4567	3.49425	1.30266	3.12949	0.482179	0.258132	0.484703	0.269711	1.50223	0.742646	0.789285
evm.TU.contig512.6	4.83207	2.76817	4.39815	0.816057	1.02286	0.802581	1.33584	0.586751	0.771344	1.89969	1.0475	0.788253
evm.TU.contig221.170	2.72221	2.99218	7.13111	1.78337	0.414612	1.83364	0.056998	0	0	1.18466	0.995612	0.75522
evm.TU.contig64.414	1.44711	2.17693	1.39341	1.13629	0.988376	0.846028	2.48457	4.45477	1.7442	0.645502	0.997226	0.751789
evm.TU.contig455.61	0.283615	1.16195	2.74651	1.22868	0	1.76865	0	1.26994	0.508788	0.253021	0.250168	0.744461
evm.TU.contig93.31	0.230496	0.629549	0.473479	0.79885	1.03953	0.82137	0.725532	0.550447	0.275664	0.753985	0.542171	0.739482
evm.TU.contig80.29	0.57432	0.336134	1.51682	0.924146	1.19546	1.09638	2.53559	2.71857	2.06059	1.17112	0.868442	0.717874
evm.TU.contig524.8	1.2398	0	0.385225	0	0.227707	0	1.37736	1.24091	1.37373	0.78075	0.707619	0.701921
evm.TU.contig598.14	0.158433	0	0	0.137274	0	0.141144	0.136009	0.141882	0.284219	0.141343	1.11799	0.693119
evm.TU.contig273.10	0	0	0	0	0	0	0	0	0	0.442786	0.31271	0.682423
evm.TU.contig487.7	0.062939	1.03143	0.221636	0	0	0	0.054031	0.112729	0.508091	0.954547	0.444134	0.660837
evm.TU.contig119.1	0	0	0	0	0	0	0	0	0	0	0	0.648402
evm.TU.contig168.91	0.299645	0.204604	1.14311	0	0	0.177964	4.97319	4.11459	2.9565	0.891073	0.704822	0.611753
evm.TU.contig586.14	4.83119	5.75612	5.03437	1.28142	4.41244	2.02023	0.169281	0.44148	0.176875	0.35184	0.347874	0.603876
evm.TU.contig300.288	1.20607	2.29412	4.09542	5.67284	2.15184	4.91179	0.443729	1.54297	0.154544	2.15194	1.3678	0.603014
evm.TU.contig414.18	3.25734	3.51185	2.94309	0.148542	0	0	0	0	0	0.382363	0.226832	0.600014
evm.TU.contig106.251	2.96669	5.45384	3.68323	1.12046	0.712528	0.406606	2.08967	1.8393	0.818778	0.407179	0.872276	0.59902
evm.TU.contig106.115	0.562599	0.384154	0.082548	0.081244	0	0	0.241485	0	0	0	0.330835	0.574299
evm.TU.contig184.25	0.76576	0.065359	0.224714	0	0	0.113699	0.328688	0.514324	0.457909	0.113859	0.506591	0.558346
evm.TU.contig178.45	0.343733	0.469415	0.554781	1.98551	0.953987	2.60288	0.983605	1.64173	1.74714	0.408871	0.252664	0.551384
evm.TU.contig269.124	0.264489	0.116099	0.831591	0.883925	0.117973	0.875183	0.778472	0.81209	0.643935	0.4045	0.233298	0.528959
evm.TU.contig34.109	2.49517	1.23375	0.454479	0.298198	1.97005	0.383255	0.147725	0	0.077176	0.84435	0.227681	0.526978
evm.TU.contig369.159	0.042152	0.12952	0.259762	0.109567	0	0.262864	0.542788	0.943713	0.75618	0.188025	0.223086	0.516342
evm.TU.contig531.51	0	0	0	0	0.073794	0	0	0	0	1.01208	0.687963	0.496308
evm.TU.contig507.226	1.78677	0.313725	1.07863	0.088465	0	0.318357	0.1753	0.045718	0.091582	0.592069	0.225152	0.491345
evm.TU.contig317.162	0.139229	0	0.245143	0	0.28981	0.124035	0.239046	0.374054	0.499537	0.12421	0.36843	0.487284
evm.TU.contig509.119	0.543276	0.476947	0.683253	3.833	3.55408	7.32897	0.866138	2.50212	1.46191	0.415433	0.136916	0.475349
evm.TU.contig273.88	2.11244	0	0.232463	0	0	1.1762	0.680044	0.236471	0.710549	1.88457	1.86332	0.462079
evm.TU.contig289.37	0.415797	0.212936	0.457563	0.090066	0.108187	0.370422	0	0	0.093239	0.278208	0.733525	0.454761
evm.TU.contig62.253	0.216725	0	0.190795	0.250373	0.225559	0.257432	0.434116	0.12939	0.129597	0.257795	0	0.442463
evm.TU.contig588.2	0.584762	0.941176	1.39732	0.289523	0.6086	0.446527	0.430283	0.673297	0.224792	0.447157	0.073686	0.438555
evm.TU.contig545.39	0	0	0	0	0	0	0.272393	0.170494	0	0.849227	0.167931	0.388683
evm.TU.contig579.151	0	0	0	0.625933	0	0.772295	0	0	0	0.128897	0.127444	0.379254
evm.TU.contig88.33	0	0.201106	0.172857	0	0	0	0	0.087919	0	0.350336	0	0.343598
evm.TU.contig566.14	1.86468	0.91673	0.065663	0.064626	0.388138	0	0.960452	1.4027	2.07397	0.266165	0.197373	0.326306
evm.TU.contig61.50	0.365988	0.749711	0.198277	0.439074	0.380908	0.451452	0.145009	0.12606	0.176766	0.150696	0.148997	0.320228
evm.TU.contig174.31	0	0	0.319752	0.078675	0	0.080893	0.233849	0	0.081446	0.24302	0.160187	0.317794
evm.TU.contig44.4	0.180888	0.370542	1.27397	0	0	0	0	0	0	1.77513	0.957337	0.316543
evm.TU.contig233.322	0.342878	0	0.301855	0	0	0.30546	0.588695	0	0	0	0	0.300007
evm.TU.contig217.106	51.4316	54.2932	12.4968	2.49551	7.92218	1.77167	0.05887	0	0	0.183534	0.181465	0.300007
evm.TU.contig193.167	6.91746	5.33566	3.75916	2.9598	4.17746	1.06513	0.87976	0.305917	0.689417	0.380942	0.602636	0.298892
evm.TU.contig522.930	0	0	0	0	0	0	0	0.097502	0	0.291394	0.096036	0.285789
evm.TU.contig580.119	0.258121	0.462657	0.681718	0.055912	0	0.057488	0.941747	2.08041	1.21552	0.402985	0.227681	0.28231
evm.TU.contig94.85	0	0	0	0	0	0	0	0	0	0.136631	0.135091	0.268006
evm.TU.contig206.120	6.87766	6.85064	8.90535	0.655298	1.18071	0.989602	0.649261	0.465643	0.466389	0.590382	0.229321	0.227474
evm.TU.contig336.122	0	0	0	0	0	0	0	0.112421	0	0.447971	0	0.219677
evm.TU.contig505.6	0	0	0.645456	0	0	0	0.209801	1.31317	0.219212	1.30817	0.431141	0.213835
evm.TU.contig44.13	0	0	0	0	0	0	0	0	0	0	0	0.213835
evm.TU.contig252.34	0	0	0	0	0	0	0	0	0	0.104565	0	0.205107
evm.TU.contig357.401	2.62546	3.36134	6.64513	0.189568	0	0	2.53559	3.42882	1.96247	0.097594	0.192987	0.191433
evm.TU.contig62.181	0.326627	0	0.958498	0.283005	0	0.387977	0	0	0	0	0	0.190526
evm.TU.contig305.47	6.09897	5.41385	1.96874	0.176148	0	0.181113	0.349049	0.455154	0.27353	0.634791	0.717297	0.17788
evm.TU.contig348.10	0.131649	0.809034	0.985138	0.741435	0.205524	0.527772	0	0	0	0.058724	0.406434	0.172783
evm.TU.contig220.17	0.44349	0	0.078086	0.38426	0.461569	0.711167	0.456864	0.873755	0.716036	0	0.156476	0.155216
evm.TU.contig522.1001	0	0	0.456187	0	0	0	0	0	0	0	0.152358	0.151131
evm.TU.contig458.61	0.323561	0	0	0	0	0	1.38882	0	1.1609	0.144329	0	0.141553
evm.TU.contig357.4	0	0	0	0	0.166037	0.568495	0	0	0	0.284648	0.703598	0.139587
evm.TU.contig522.636	0	0	0	0	0	0.069376	0.200555	0.139478	0.069851	0	0.06869	0.136274
evm.TU.contig220.12	0	0	0.128002	0.377937	0.529636	0.453357	0.561682	0.45573	0.652086	0.064857	0.320627	0.127218
evm.TU.contig217.145	0.120276	0.492762	0.529432	2.70954	0.625898	3.96458	1.85855	2.36966	1.94192	0.53651	0.636554	0.105238
evm.TU.contig94.43	12.0165	14.359	1.65943	0	0	0.209906	0	0	0	0.105101	0.311748	0.103079
evm.TU.contig61.193	0.056306	0.346021	0.223062	0.097572	0.351607	0.100323	0.290019	0.378179	0.050505	0.12558	0.124164	0.098532
evm.TU.contig480.159	0	0.334541	0.287549	0.18867	0.113314	0.193989	0.841192	0.292506	1.36722	0.388525	0.288109	0.095263
evm.TU.contig260.3	0.774364	0.088125	0.075746	0.372747	1.61186	0.076651	0	0.154105	0.077176	0.230277	0.151788	0.075283
evm.TU.contig399.5	1.37151	0.087796	0.905566	0	0	0	0.220761	0	0	0.152945	0	0.075002
evm.TU.contig233.153	0	0	0.212887	0.139682	0	0.07181	0.899568	0.649672	0.578412	0.431467	0.142201	0.070528
evm.TU.contig336.117	0.078139	0.080032	0.550321	0.609327	0.243972	2.15796	0.804951	0.69976	1.12141	0.487969	0.137848	0.068369
evm.TU.contig370.253	0.345976	0.212615	0.791915	0.059954	0.072016	0.123288	0	0	0	0	0	0.060544
evm.TU.contig106.140	0.271065	0.138817	0	0.234864	0	0	0	0	0.060784	0	0.119549	0.059293
evm.TU.contig189.2	0.249704	1.27877	0.659488	0	0	0	0	0	0	0	0.220257	0
evm.TU.contig522.1294	0	0	0	0	0	0.077817	0	0.078224	0	0.155853	0	0
evm.TU.contig87.111	0.499409	0	0.439659	2.88474	0	2.66945	0	0	0	0.297024	0.146838	0
evm.TU.contig442.48	0	0	0	0.077753	0	0	0	0	0	0	0	0
evm.TU.contig515.277	0.2393	0	0.42134	0	0	0	0	0	0	0	0	0
evm.TU.contig260.14	0	0.140474	0	0	0	0	0	0	0	0	0	0
evm.TU.contig127.180	0	0	0.115567	0	0	0	0	0	0	0	0	0
evm.TU.contig280.110	0.568986	0.218539	0.626139	0.123249	0.370113	0.316808	0.244226	0.127387	0.255182	0	0.125471	0
evm.TU.contig280.113	1134.36	1278.15	1883.79	0.206266	0	0	0.204366	0.213191	0	0	0.104993	0
evm.TU.contig62.54	1.28579	1.05356	0.226391	0.074271	0	0.15273	0.367935	0	0.153775	0	0.075611	0
evm.TU.contig522.1101	0.144483	0.221976	0.190795	0.500747	0.225559	0.386147	0	0	0	0	0	0
evm.TU.contig263.6	0	0	0	0	0	0	0	0.209928	0	0	0	0
evm.TU.contig515.64	0.640357	0	0.070468	0	0.083308	0	0.618438	0.716828	1.50775	0.21423	0.14121	0
evm.TU.contig233.149	0	0	0.521245	0.205203	0	0.210988	0	0	0	0.211285	0	0
evm.TU.contig118.6	0	0	0.705499	0	0	0	0	0	0	0	0	0
evm.TU.contig280.45	0	0.22409	0.096306	0	0	0	0	0	0	0	0	0
evm.TU.contig425.4	0	0	0	0	0	0	0.090465	0	0	0	0.092952	0
evm.TU.contig579.59	0	1.56863	1.12357	0	0	0	0	0	0	0	0	0
evm.TU.contig195.95	0	0	0.384006	0.251958	0.151325	0.388591	1.12336	1.43229	0.91292	0.129713	0	0
evm.TU.contig106.188	0.848749	0.811359	0.298881	0	0	0	0	0	0	0	0	0
evm.TU.contig193.60	0	0.247678	0	0	0	0	0	0	0	0	0	0
evm.TU.contig32.14	0.170169	0	0.14981	0	0	0	0	0	0	0	0	0
evm.TU.contig468.37	0	0	0	0	0	0	0	0	0	0	0.125861	0
evm.TU.contig37.26	0	0	0	0	0	0	0	0.098908	0	0	0	0
evm.TU.contig56.97	0.835374	0.713012	0.490286	3.25713	7.67995	3.72106	0	0.124685	0	0.24842	0	0
evm.TU.contig153.5	0	0	0.293106	0	0	0	0	0	0	0	0	0
evm.TU.contig522.785	0.328183	0	0	0.284353	0	0	1.12693	0	0	0	0	0
evm.TU.contig370.264	0	0.073992	0	0	0	0	0	0	0	0	0	0
evm.TU.contig370.262	0.068169	0	0	0	0	0	0	0.183142	0.12229	0.060815	0	0
evm.TU.contig370.263	0.273486	0.210084	0.300957	0	0	0	0	0	0	0	0	0
evm.TU.contig91.43	1.99764	0.837014	1.27901	0	0	0	0	0	0	0	0	0
evm.TU.contig369.105	0.82313	0.613144	0.329386	0	0	0	0	0	0	0.467305	0	0
evm.TU.contig204.3	0.180888	0	0	0	0	2.25607	0	0	0	0	0.079778	0
evm.TU.contig522.278	0.168918	0	0	0	0	0	0	0	0	0	0	0
evm.TU.contig263.12	0.787639	0.806722	0.46227	0	0	0	0	0	0	0	0	0
evm.TU.contig369.115	0.757345	1.37901	1.33347	0	0	0	0.144478	0.075359	0	0	0	0
evm.TU.contig221.99	361.343	402.818	359.824	0	0.124528	0.106593	0.102715	0	0	0	0	0
evm.TU.contig579.61	0	0	0	0	0	0	0.146084	0	0	0.303625	0	0
evm.TU.contig111.22	0.816569	1.11514	0.431324	0	0.056657	0	0	0	0	0	0	0
evm.TU.contig370.50	0.929047	0.259516	2.30498	0.146358	0	0	0	0	0	0	0	0
evm.TU.contig522.339	0.820457	0	0.240765	0	0	0	0	0	0	0	0	0
evm.TU.contig579.62	26.956	26.1859	58.9603	0.240782	0	0	0	0	0	0	0	0
evm.TU.contig289.20	0	0	0.073543	0	0	0	0	0	0	0	0	0
evm.TU.contig600.47	0.057866	0.059268	0	0	0.180675	0.051551	0.049676	0.155463	0	0.051624	0	0
evm.TU.contig271.24	0	0.324544	0.069739	0.137274	0	0.070572	0.408027	0.56753	0.14211	0.141343	0	0
evm.TU.contig239.137	0	0	0.112357	0.221163	0.199244	0.170548	0	0	0	0	0.056288	0
evm.TU.contig64.151	0.194685	0	0	0	0	0	0	0	0	0	0	0
evm.TU.contig184.235	0	0	0	0	0	0	0.142221	0	0	0	0	0
evm.TU.contig232.72	0	0	0.10012	0	0	0	0	0	0	0	0	0
evm.TU.contig155.35	0	0	0.299619	0	0	0	0	0	0	0	0.150101	0
evm.TU.contig300.74	0	0.522876	0	0	0	0	0	0	0.152636	0	0.150101	0
evm.TU.contig214.15	0.153664	0	0	0	0.079964	0.205343	0.395745	0.068806	0	0.068544	0.067771	0
evm.TU.contig199.59	0	0	0	0	0	0.084221	0	0	0	0	0	0
evm.TU.contig168.464	0	0	0.407201	0	0	0	0	0	0	0	0	0
evm.TU.contig340.8	0.074346	0.076147	0.589057	0	0	0.066232	0	0	0	0	0	0
evm.TU.contig559.186	0	0	0	0.214799	0	0.147236	0.14188	0.296014	0.222366	0	0	0
evm.TU.contig392.6	0	0	0	0	0	0	0	0	0.101009	0	0	0
evm.TU.contig126.245	0	0	0.049208	0	0	0	0	0	0	0	0	0
evm.TU.contig127.72	0	0	0	0	0	0	0	0	0	0	0.088103	0
evm.TU.contig487.48	0	0	0.0868	0	0	0	0	0	0	0	0.173937	0
evm.TU.contig480.70	0.174698	0	0.384492	0	0	0	0	0	0	0	0	0
evm.TU.contig168.490	0	0	0.501429	0	0	0.169139	0	0	0	0	0	0
evm.TU.contig293.4	0.124852	0	0	0.216355	0	0.111227	0	0	0	0.111384	0	0
evm.TU.contig412.4	0	0	0	0	0	0.587134	0	0	0	0	0	0
evm.TU.contig600.102	0	0	0	0	0.139007	0	0	0.11961	0	0	0.117812	0
evm.TU.contig75.120	0	0	0.146553	0	0.693023	1.03812	0	0	0	0.148512	0.146838	0
evm.TU.contig579.60	0.459456	0	0.134829	0	0	0	0	0	0	0	0	0
evm.TU.contig374.128	0.696145	0	0	0	1.44905	0	0	0.623423	0.624422	0	0	0
evm.TU.contig103.5	0	0	0.264947	0.04346	0	0.044685	0.04306	0	0	0.044748	0	0

## Sheet: Sheet2
name	Flower01	Flower02	Flower03	Leaf01	Leaf02	Leaf03	Root01	Root02	Root03	Stem01	Stem02	Stem03
evm.TU.contig357.421	1061.53	1231.13	333.933	519.869	1667.87	535.997	259.246	226.46	288.451	697.133	589.88	828.982
evm.TU.contig57.4	900.297	731.152	94.6835	139.717	894.715	128.125	198.988	165.047	655.878	563.373	618.79	621.822
evm.TU.contig106.147	35.6474	24.1785	26.4311	303.238	133.727	267.89	116.424	163.945	109.638	566.007	682.326	612.094
evm.TU.contig205.137	339.709	455.421	245.228	131.912	275.082	165.224	62.1873	52.9019	70.2899	356.05	372.088	370.493
evm.TU.contig81.1	154.28	168.412	72.3781	146.422	254.405	144.662	108.67	121.958	152.498	369.817	315.058	326.977
evm.TU.contig333.3	291.057	313.655	283.501	180.919	142.815	173.594	247.397	262.121	234.576	294.794	294.004	291.636
evm.TU.contig195.147	29.302	44.6579	60.2602	13.8114	5.12342	15.8714	73.653	63.8181	64.9717	237.989	198.915	221.31
evm.TU.contig305.427	203.987	178.313	30.8238	21.5834	135.246	25.274	71.163	48.458	264.029	183.958	209.961	209.481
evm.TU.contig205.28	11.1497	8.2008	9.22281	16.8574	20.171	16.7993	58.136	61.7859	53.0921	187.523	205.937	189.219
evm.TU.contig433.81	18.4418	19.2143	21.9038	208.552	156.693	251.821	33.0963	45.773	32.4418	167.432	166.176	153.153
evm.TU.contig591.29	75.2424	67.5479	32.1544	285.263	363.743	204.313	83.8709	69.5782	158.133	188.942	137.064	133.815
evm.TU.contig289.147	19.4536	29.5369	22.9782	2.28692	3.10312	1.82886	15.9449	12.4751	17.3177	122.881	135.68	133.732
evm.TU.contig369.119	19.0506	21.3773	13.8117	56.6191	72.4568	58.9016	7.93662	8.84386	8.16698	119.469	134.185	127.344
evm.TU.contig587.35	58.5119	58.9241	39.5843	110.241	248.084	189.965	2.35981	2.98923	0.880595	161.33	100.279	123.523
evm.TU.contig455.337	23.0363	23.5944	14.861	23.0389	44.9785	27.9285	6.26505	4.717	9.73373	119.854	111.002	117.771
evm.TU.contig583.92	20.4411	17.9592	7.67698	34.691	71.8255	42.6023	27.2878	18.9775	41.6324	131.501	97.4309	117.731
evm.TU.contig507.256	93.7029	82.4643	35.9827	83.7001	160.351	85.6723	38.8827	31.9952	45.567	96.978	107.519	108.682
evm.TU.contig139.181	98.3736	81.8093	53.4309	267.531	222.561	181.794	177.036	179.793	173.28	95.2022	121.348	105.511
evm.TU.contig168.306	30.0658	33.3966	29.917	183.453	121.97	114.212	737.413	676.348	631.092	86.5121	146.141	99.3907
evm.TU.contig206.177	28.716	35.1284	82.7487	75.4135	26.2665	77.1792	143.049	151.399	136.043	99.9477	98.1074	95.1233
evm.TU.contig317.76	26.4302	19.3586	18.0598	22.6341	35.4241	27.7897	10.2234	16.4446	10.7509	85.543	76.7849	87.9983
evm.TU.contig300.267	397.948	409.783	302.205	83.5426	165.651	101.596	531.061	508.13	442.104	93.3647	113.084	86.7418
evm.TU.contig139.149	34.6065	24.736	2.1175	38.8737	234.904	28.0749	36.6614	25.6283	171.32	84.1683	96.5121	86.7154
evm.TU.contig195.212	193.784	195.199	126.344	93.9467	116.111	96.7127	130.682	142.68	119.106	78.2096	91.1864	85.7446
evm.TU.contig480.35	121.135	205.042	60.4665	174.318	309.906	115.799	164.512	113.886	162.219	71.47	109.692	84.7091
evm.TU.contig215.18	281.044	299.221	93.347	44.6692	116.317	40.719	123.399	102.277	102.28	92.0397	76.5807	84.5263
evm.TU.contig583.171	88.4794	91.0891	61.3404	39.678	45.1357	40.9316	36.4486	29.4675	39.8517	91.6511	81.2552	80.0038
evm.TU.contig522.838	161.168	165.147	115.847	160.357	273.462	207.28	25.083	31.6952	24.9203	92.2261	74.1522	76.8214
evm.TU.contig197.89	13.7735	13.899	8.81457	13.167	21.7405	17.4322	1.17804	1.09237	1.23088	67.9226	63.7049	76.1772
evm.TU.contig370.138	127.871	140.58	42.6704	35.7724	102.439	31.0734	193.657	171.654	257.719	66.9685	79.5134	75.5324
evm.TU.contig507.450	27.5041	28.2785	41.9329	31.7745	56.2636	38.8663	11.489	11.7964	10.492	65.8086	59.1178	74.593
evm.TU.contig522.251	97.7377	122.063	78.2457	22.8725	31.2234	24.8326	11.3562	7.77435	7.57492	86.1936	77.929	73.3744
evm.TU.contig522.341	8.27848	4.87546	2.00421	19.7254	54.7113	18.0689	0	0	0	93.6108	65.7199	67.1826
evm.TU.contig64.422	103.714	126.231	86.2332	39.8094	69.1578	39.9983	106.251	98.844	128.938	57.4118	74.784	66.1285
evm.TU.contig580.151	57.432	66.2107	91.0093	92.3485	49.4867	73.2962	156.853	163.148	145.679	69.5866	61.4978	64.5084
evm.TU.contig126.173	0	0	0	0	0.159395	0.068219	0.657376	0.274306	0.618177	49.0506	42.8914	64.1875
evm.TU.contig126.148	64.7975	73.1595	81.9397	100.057	72.8124	95.2821	35.417	37.4979	32.2047	62.4137	60.206	63.907
evm.TU.contig273.217	22.4215	19.7647	3.47858	27.4685	161.531	28.6521	7.09966	8.39376	32.3925	62.7137	53.0907	60.8642
evm.TU.contig45.9	63.2428	93.4256	60.0186	13.6406	24.6125	12.3397	9.51262	9.68139	7.21207	64.7391	57.5726	60.3014
evm.TU.contig312.23	18.7098	16.2523	55.669	52.9424	13.3103	52.325	41.8823	48.7812	48.8594	53.4552	58.2841	57.1931
evm.TU.contig459.153	387.032	422.995	114.845	51.0542	185.142	60.4672	29.4539	36.4034	28.1659	59.3547	46.7116	56.3857
evm.TU.contig76.33	49.1653	68.6274	52.7824	108.571	57.8713	92.4062	73.2078	67.0959	66.0326	73.5945	77.14	54.2865
evm.TU.contig244.196	29.1194	27.0783	45.8181	92.018	70.6411	94.2315	33.8807	38.0855	34.6554	54.1373	52.271	53.3451
evm.TU.contig357.58	106.469	120.852	52.4085	54.9528	163.393	60.2416	2.09661	2.05046	1.91683	68.7695	44.0953	53.2228
evm.TU.contig357.550	0.827021	0.941176	1.13256	0	0	0.081863	1.26216	1.72813	2.22544	40.8254	30.1523	50.4924
evm.TU.contig269.127	15.6343	22.6797	32.3027	43.6244	20.0572	46.7303	4.21816	3.82885	3.03365	51.6921	43.398	48.1853
evm.TU.contig357.464	59.9732	53.5832	43.5508	61.1232	49.0176	51.6173	24.0262	29.3119	28.3255	42.9844	51.8845	47.3754
evm.TU.contig583.170	17.8104	24.5869	47.9475	34.4418	13.9695	23.2252	16.6191	17.7991	21.3005	46.9766	50.5453	47.2022
evm.TU.contig357.426	87.7589	104.017	39.0921	26.5193	83.1723	24.5215	48.1608	51.4324	44.9184	39.2398	43.1838	44.8583
evm.TU.contig455.366	29.1915	35.444	70.5918	19.2708	11.2693	23.0729	21.6055	23.3903	28.9401	47.6469	48.0777	44.8099
evm.TU.contig606.71	32.6157	27.8867	93.8807	49.8846	11.2167	25.7718	14.1214	12.9533	8.395	40.4833	47.7822	43.6751
evm.TU.contig233.73	31.3074	34.0029	52.7188	56.3157	38.8526	60.2119	49.9045	53.6277	44.2273	39.8022	43.9251	41.2427
evm.TU.contig522.1150	52.4747	66.2126	20.0114	6.77458	21.2247	6.46289	48.3691	36.5982	145.254	40.6298	42.0915	40.9767
evm.TU.contig126.220	12.1736	13.9769	12.9643	5.59288	3.83162	5.26951	16.5819	16.0232	17.0615	38.7122	40.2891	40.2868
evm.TU.contig514.31	57.6441	52.9567	59.0187	29.4106	38.5451	34.7217	11.0835	11.6164	10.3301	35.7981	33.5232	39.9357
evm.TU.contig223.8	13.8069	22.5787	24.8207	11.8624	6.39996	11.0598	71.2158	80.3176	83.0481	37.1596	42.2671	39.8964
evm.TU.contig168.691	56.5029	78.8062	23.7189	32.7842	176.595	40.9316	7.17797	8.24431	6.81813	42.1196	32.1834	38.4273
evm.TU.contig34.129	2.18789	4.10831	2.35415	27.9087	14.295	21.7652	27.7559	23.1854	26.4933	46.845	44.387	37.1167
evm.TU.contig273.357	13.8269	19.2513	22.3799	12.9162	5.09665	13.3445	3.09111	3.61155	2.39003	37.3273	33.4128	36.9243
evm.TU.contig591.12	24.9704	32.1228	26.3795	14.7122	23.9093	19.9319	4.45873	5.09851	4.30036	44.5537	31.3646	36.7052
evm.TU.contig388.19	23.0904	25.015	37.2044	20.1425	12.1179	20.8849	53.611	59.9986	45.8886	41.1992	42.5675	35.9133
evm.TU.contig273.40	7.52759	6.152	14.5244	24.8386	14.8164	26.3727	147.324	124.136	130.003	36.0136	41.3874	35.8327
evm.TU.contig62.45	37.4556	42.8389	56.9358	28.5589	23.1296	33.1457	64.6301	68.7629	64.7294	39.8755	37.7741	35.1758
evm.TU.contig34.26	68.0286	80.4474	53.9077	33.2212	65.9189	33.0047	61.1777	71.4982	56.9565	35.5049	36.1035	34.6096
evm.TU.contig39.22	16.5459	18.6274	35.9944	33.1745	12.3816	39.2261	21.9517	19.7157	19.9926	38.0615	33.049	34.4579
evm.TU.contig358.57	23.206	32.8456	23.6635	12.3773	11.8333	13.5054	44.6482	46.2108	47.9061	30.534	33.6356	34.334
evm.TU.contig591.116	41.8546	50.5238	23.5488	30.1297	44.5433	39.8803	2.56647	3.02958	1.90534	40.2173	32.2692	34.0056
evm.TU.contig56.51	38.1175	38.5318	30.818	38.603	52.5354	38.2358	45.0041	51.057	45.5318	30.5456	33.8229	33.0035
evm.TU.contig127.59	22.9728	32.2885	36.6104	57.8253	49.5638	57.2146	27.9265	27.3305	25.2686	40.6902	34.9067	32.865
evm.TU.contig350.30	185.732	158.289	253.417	43.6094	33.5455	43.3503	123.527	121.942	99.3455	36.021	36.843	32.5871
evm.TU.contig39.21	20.5194	16.9046	39.0741	25.5089	20.1952	34.9707	16.0834	18.975	15.2044	37.6067	30.2971	32.3949
evm.TU.contig369.211	33.5177	44.3587	54.5393	29.9386	13.7184	33.5505	18.8322	23.3554	19.9303	39.8974	33.3021	32.2925
evm.TU.contig127.139	42.5104	50.6872	63.13	43.8089	33.0708	46.3828	204.401	201.019	194.986	32.6574	34.7512	32.2171
evm.TU.contig289.82	15.4371	17.4597	40.7706	62.3765	18.5031	57.943	4.58489	2.7518	4.79055	39.8145	31.7507	31.3029
evm.TU.contig522.467	54.2085	82.6784	96.4052	11.0145	8.03276	13.9944	5.45648	4.30975	6.10847	34.1038	35.8819	29.7137
evm.TU.contig378.64	15.5285	18.5613	10.7942	72.439	87.013	66.1388	173.906	165.217	158.291	33.086	32.2376	28.8834
evm.TU.contig459.105	39.2532	43.4338	36.653	5.18525	5.75966	4.24221	6.62901	4.32205	4.84845	31.3448	23.7261	28.4334
evm.TU.contig136.18	117.793	109.435	89.7199	39.5422	60.5755	40.3135	6.81642	6.83464	5.87753	33.0116	22.7796	27.2503
evm.TU.contig336.28	7.05178	19.1363	2.24003	0.881853	0.756623	0.841948	0.249637	0.390626	0.130417	33.92	30.2031	26.7794
evm.TU.contig126.234	46.324	55.3079	39.1638	46.9282	64.0206	45.8916	14.0137	14.0864	14.3999	27.1976	25.3653	26.7691
evm.TU.contig264.5	0.301283	0.462874	0.663092	0	0	0.201303	0.25864	0.202357	0.135121	20.6963	12.2246	26.4272
evm.TU.contig126.208	23.8343	15.3922	4.97181	34.4185	46.922	35.9004	88.6636	69.6909	93.9286	30.5712	27.8625	25.8793
evm.TU.contig48.2	16.0846	20.0019	15.6762	27.9682	35.3873	29.2788	11.512	14.3387	11.6668	28.7318	24.562	25.8389
evm.TU.contig220.16	0	0	0	58.7509	8.86957	81.8632	9.22447	4.97733	5.48383	24.4614	20.4271	25.774
evm.TU.contig549.28	0	0	0.068325	0	0	0	0.199878	0.347516	0.069615	36.4196	20.7428	25.6009
evm.TU.contig507.192	8.66701	9.41176	9.83636	53.6522	24.5614	31.3499	56.2057	47.3178	47.3936	29.7173	44.58	25.5824
evm.TU.contig87.212	2.73804	7.38714	10.6413	5.72838	4.44824	6.06835	14.5617	16.865	11.7406	31.2782	23.6802	24.9503
evm.TU.contig299.57	0	0	0	0	0	0	2.99944	8.21354	4.38757	14.5723	13.6375	24.839
evm.TU.contig432.31	6.00702	5.23799	14.8645	29.3999	15.0383	30.084	16.7248	17.8832	15.145	26.2158	24.2018	24.22
evm.TU.contig370.284	15.0456	16.57	24.8294	38.7347	32.6087	41.316	48.6551	46.7479	41.1634	21.072	24.2117	24.1583
evm.TU.contig206.214	4.10511	6.54942	5.76844	12.0386	6.65516	13.8549	2.84637	3.03999	3.82378	21.692	18.5228	22.7943
evm.TU.contig606.25	7.62563	10.2665	13.1732	24.4757	18.9178	23.4994	24.2502	26.9295	24.1334	26.5276	25.1709	22.7442
evm.TU.contig168.268	11.4595	15.4291	15.6537	19.5551	15.4822	19.2915	18.4281	18.8866	17.5174	21.6466	23.2296	22.7366
evm.TU.contig455.365	19.3274	17.2596	53.5883	39.1538	20.2585	44.6694	21.0793	21.4353	19.6188	29.6989	24.1465	22.3272
evm.TU.contig603.64	11.1135	9.09091	20.6839	0.323128	0.388138	0.53158	18.6328	16.8992	15.053	21.0936	22.6321	21.7972
evm.TU.contig34.123	21.6248	21.6885	27.6415	24.4307	22.214	25.6198	5.11114	6.13668	4.33278	23.9522	19.7187	21.4765
evm.TU.contig204.103	22.4884	17.9305	14.1326	16.1276	18.4361	11.2808	32.255	33.6479	54.2457	23.0256	23.5595	21.3719
evm.TU.contig107.18	295.421	258.259	148.15	153.716	333.584	133.799	0.202616	0.352277	0.070568	20.7052	24.5662	20.72
evm.TU.contig220.21	1.3839	0.85046	2.924	114.152	75.4727	177.535	7.841	3.96587	3.97222	22.4701	19.2871	20.5848
evm.TU.contig37.30	2.94862	2.16362	3.91313	1.14395	0.687048	2.15636	5.78038	5.39942	5.84229	14.841	14.6349	20.5625
evm.TU.contig78.107	36.286	45.6235	40.3164	25.0652	11.6682	20.9117	2.83574	4.57177	3.54655	19.6017	19.0275	20.188
evm.TU.contig206.198	24.1706	27.6043	24.8567	25.094	26.8924	28.1643	12.4865	12.9874	11.6268	20.2275	18.9052	19.9507
evm.TU.contig559.113	49.2585	62.7368	77.8316	22.1466	16.2583	25.0545	8.51129	9.22535	7.2446	21.2066	14.8458	19.8042
evm.TU.contig139.232	31.4614	42.5596	15.4165	2.52023	1.85343	1.69226	2.95565	1.54164	2.60902	15.6226	10.8387	19.5291
evm.TU.contig600.201	11.1246	20.0093	10.988	166.839	168.306	109.5	0.5435	1.05295	0.405628	30.742	20.8221	18.8343
evm.TU.contig600.126	102.727	232.075	87.6704	2.62892	2.14281	0.386147	1.76747	0.582253	2.23555	22.3315	11.6611	18.5834
evm.TU.contig522.89	23.8103	27.0833	40.3433	24.1033	14.9433	24.1966	21.2107	18.3764	20.0693	19.0537	18.3639	18.3207
evm.TU.contig168.735	10.1197	8.45867	18.1763	11.9428	5.81086	11.9686	35.5982	38.4896	33.8041	21.3249	21.2896	17.7088
evm.TU.contig522.1548	0.494039	0.759013	0.326198	1.28417	1.92817	1.98056	8.37625	7.07887	6.53628	18.8419	15.1433	17.3988
evm.TU.contig357.430	61.2608	63.4191	62.4636	26.0731	25.2168	28.2471	9.86064	8.78636	9.28339	17.0255	17.9418	17.1168
evm.TU.contig116.63	14.0031	20.6543	19.6846	18.7026	17.9991	17.9363	11.8549	14.1873	12.5314	14.565	14.9985	16.9668
evm.TU.contig168.634	34.3599	44.4821	8.97563	10.2105	51.4704	11.265	5.11503	3.55728	7.30411	13.1709	15.5919	16.7986
evm.TU.contig317.141	52.673	76.2536	142.096	10.8375	6.22368	13.6735	22.8442	23.2506	19.5331	16.3157	17.4065	16.7431
evm.TU.contig184.281	0.378153	0	0.083228	0	0.393569	0	2.19125	1.10061	1.35677	15.5186	12.842	16.4609
evm.TU.contig507.193	6.54087	7.51634	8.42679	30.4099	21.5848	18.334	26.432	26.2877	20.749	14.6594	20.5451	15.9129
evm.TU.contig522.23	8.90671	10.4204	8.30328	12.4542	13.6974	14.547	20.5916	20.0704	18.4138	15.2135	14.9143	15.8079
evm.TU.contig357.357	77.8057	56.7625	23.841	5.15778	8.81328	3.73464	17.634	15.6174	20.3051	16.9792	16.1222	15.7723
evm.TU.contig193.512	6.85007	7.18716	13.2867	55.0093	35.2988	62.5882	1.91237	1.74558	1.19889	16.4206	14.4916	15.6174
evm.TU.contig509.149	1.72296	5	4.29766	6.22021	3.28753	5.88392	105.509	99.0073	57.9541	13.8339	23.8098	15.3266
evm.TU.contig370.380	9.58192	7.8025	8.6975	2.99086	3.159	2.86309	1.89038	1.11925	2.29548	13.6985	13.4916	15.1534
evm.TU.contig600.166	78.7761	80.5092	14.2627	77.8362	199.75	61.0156	44.8144	34.6977	52.2068	13.0004	9.60254	14.9253
evm.TU.contig94.11	9.33733	13.5104	12.7217	34.6727	29.1539	34.5938	9.09724	9.88829	9.17295	16.0652	14.7075	14.9132
evm.TU.contig522.1422	18.5852	20.1802	23.8319	22.1641	17.9643	24.264	14.9597	15.6799	14.7026	15.4726	12.9979	14.8128
evm.TU.contig134.33	53.1144	60.5757	4.51819	6.35256	82.1564	9.65232	0	0.145907	0.949918	15.6254	10.4911	14.1844
evm.TU.contig317.110	9.74792	12.7822	16.726	8.01567	13.764	10.5648	5.17018	5.28224	5.68055	14.1801	15.9371	14.016
evm.TU.contig206.295	4.92471	7.49559	12.3041	15.2325	9.13421	15.6619	15.9187	17.3453	13.5728	13.2786	13.4929	13.6009
evm.TU.contig509.177	21.8863	19.2369	12.2986	20.3082	17.3665	21.7795	0.399756	0.278013	0.278458	16.9635	9.37878	13.4456
evm.TU.contig244.71	22.2549	34.8856	22.0501	20.2503	22.83	22.3845	15.8866	16.8584	13.8088	14.6594	16.3938	13.4003
evm.TU.contig289.10	10.9515	14.677	14.2016	18.7094	17.8734	18.4343	27.5035	29.0694	23.7372	12.4575	14.8252	12.9569
evm.TU.contig419.8	6.86264	6.0319	11.8261	12.9043	6.07863	12.5743	3.30081	3.79205	2.53208	13.0697	9.27319	12.6905
evm.TU.contig168.474	176.066	164.167	117.589	49.5338	75.8648	56.294	12.4952	15.2334	13.2129	16.6878	15.2622	12.6843
evm.TU.contig412.44	0.138808	0	0.244402	0	0	0.12366	0.297905	0.248616	0.124507	15.727	11.999	12.5097
evm.TU.contig184.280	1.18825	0	0	0	0	0	1.19008	0.177353	0.177637	11.4841	6.28871	12.4762
evm.TU.contig357.429	132.159	131.514	21.3009	7.644	52.7277	8.48203	3.89927	2.81607	4.93602	10.9097	11.7883	12.4577
evm.TU.contig290.16	12.7867	16.6482	9.25357	11.1729	24.1349	12.3567	4.4652	5.14324	6.22065	13.1475	9.74948	11.9465
evm.TU.contig269.27	8.04422	7.35773	15.5141	6.35394	4.82859	8.19966	6.03844	6.03116	4.4635	12.5839	11.881	11.8835
evm.TU.contig370.232	3.47263	4.26813	5.26772	13.2852	14.1788	15.278	13.0252	12.4395	10.9739	11.4389	11.7341	11.8733
evm.TU.contig497.1	9.19359	7.6293	1.24063	1.10474	15.0161	2.27176	0.518476	0.661059	3.67175	10.0578	12.7856	11.8606
evm.TU.contig579.80	79.2083	82.598	78.5798	50.0727	53.2978	68.7523	2.87602	5.35754	3.54164	15.371	16.042	11.83
evm.TU.contig455.602	3.6405	3.53584	3.64701	1.63153	0.522607	1.17427	1.67038	2.41704	2.19571	9.2954	9.57817	11.6429
evm.TU.contig511.10	16.8387	25.87	21.7067	2.44901	3.25467	2.41089	3.97523	3.87762	4.15355	11.3204	10.5031	11.5762
evm.TU.contig522.1231	6.69938	6.18801	7.84952	4.91812	5.42586	5.2738	7.52881	8.68296	6.0747	14.8874	11.2385	11.5743
evm.TU.contig375.41	40.7345	51.1934	6.20298	7.88556	62.2558	8.76172	1.38616	0.920196	2.30417	10.6075	9.64627	11.3667
evm.TU.contig455.612	4.68971	3.48068	3.88929	94.5767	53.7605	112.32	23.8056	14.4863	13.4731	8.12511	11.5107	11.1801
evm.TU.contig450.123	43.7356	70.1712	25.0884	10.4311	31.2334	12.5386	15.3776	13.8542	14.0851	12.0893	11.4913	11.0425
evm.TU.contig75.124	16.9999	14.2521	16.9306	11.0898	10.725	11.227	14.0303	15.6354	14.2475	11.4185	10.4792	11.0265
evm.TU.contig168.8	5.83633	6.86804	7.21516	21.9489	33.6022	26.7162	10.0739	10.3421	6.79438	10.8566	9.25555	10.8108
evm.TU.contig339.62	16.4091	29.1826	11.8851	0.58163	0.853903	0.53158	0	0.066795	0.133805	11.9109	8.94758	10.5723
evm.TU.contig527.160	148.207	128.269	57.7837	18.5398	32.7899	14.5015	1.01424	0.705358	0.235496	9.369	7.06332	10.5671
evm.TU.contig106.33	5.59499	5.5408	1.01121	3.75621	10.2964	3.03686	9.60618	7.6319	24.0956	10.9415	11.8314	10.4717
evm.TU.contig8.96	41.0113	50.1243	44.6501	4.76591	5.97732	6.84596	1.87491	3.18736	7.47327	11.6185	8.49075	10.121
evm.TU.contig522.1692	47.3222	45.5166	28.2534	12.5989	24.6257	14.487	2.9545	4.23787	3.70443	11.8977	8.5001	9.86202
evm.TU.contig591.33	1.30035	0.702923	1.62176	2.66022	1.50373	2.47778	1.70546	1.48798	1.78196	7.73384	7.00943	9.63937
evm.TU.contig299.9	29.1046	33.4365	12.8493	27.2754	82.4241	31.0449	1.4828	1.43083	1.31692	9.0531	9.21767	9.63462
evm.TU.contig317.90	5.96669	5.91962	10.6338	9.40294	6.44793	10.557	4.71169	4.93379	4.06524	8.55027	8.28884	9.44085
evm.TU.contig370.251	2.00733	1.25642	6.47963	111.988	29.3643	114.251	1.72322	1.69777	2.20063	10.8443	10.8204	9.26963
evm.TU.contig509.208	3.52096	3.01507	3.55704	3.85091	3.66449	4.06231	5.54971	5.89276	6.16106	6.53976	8.50258	8.3331
evm.TU.contig206.302	6.01032	7.5513	11.4526	10.9476	6.22753	11.6845	16.4879	15.645	12.9146	7.79275	8.78876	8.15705
evm.TU.contig455.185	16.8194	20.028	11.316	10.9002	13.9471	9.50198	6.2216	4.53095	8.95376	10.1253	9.40812	7.65732
evm.TU.contig391.4	3.24616	4.27475	2.54374	3.64713	7.68513	4.67154	9.92189	13.0657	6.81531	6.81034	7.4258	7.39722
evm.TU.contig116.95	5.72994	7.77068	4.4372	8.04462	12.8657	7.84602	2.55056	2.09055	2.18908	8.37773	5.61579	7.381
evm.TU.contig220.20	1.05622	0	1.85971	86.2536	43.4215	123.501	3.17354	1.41882	0.947398	6.83156	8.15204	7.16223
evm.TU.contig205.55	16.0155	21.9067	6.48876	8.74374	20.6115	11.0153	12.0338	13.047	10.3493	6.60623	7.83811	7.11201
evm.TU.contig363.50	3.08878	2.76817	4.92861	6.35612	11.2514	4.81548	7.62336	7.43392	16.1038	12.4001	10.5575	6.92537
evm.TU.contig36.39	89.3682	69.7042	62.1342	11.2755	16.3772	13.0129	0.170994	0.059459	0.059555	6.51565	6.4422	6.91316
evm.TU.contig522.154	93.337	95.5162	22.9114	0.835162	3.84555	1.00182	13.1705	6.47401	17.2196	7.88257	8.57308	6.88757
evm.TU.contig66.36	0.703249	1.92077	1.03185	5.07773	1.70781	5.42971	35.8203	41.9856	40.1605	4.39172	9.30473	6.76852
evm.TU.contig305.125	8.09832	11.1158	6.40194	7.20769	13.1874	6.62562	12.58	11.1005	11.8595	7.12645	8.11517	6.70015
evm.TU.contig126.366	7.19148	4.05115	3.23589	6.81952	27.6932	6.3711	1.06323	0.429349	0.824236	9.12459	7.33015	6.64189
evm.TU.contig64.14	3.44592	2.19608	10.7863	29.7907	10.4404	40.113	5.71917	9.25783	4.87673	8.53945	4.59309	6.56615
evm.TU.contig587.69	17.6531	20.1507	33.7246	2.18874	3.30957	2.48873	34.7482	38.8571	30.6823	8.56375	5.37393	6.5528
evm.TU.contig106.76	6.02473	6.1707	1.63579	9.02541	22.0926	8.62774	1.01507	0.403391	1.21211	5.3246	4.61892	6.45382
evm.TU.contig357.471	31.0958	41.9889	16.4253	114.699	159.968	73.1568	89.3451	89.6799	91.7589	8.49227	11.4193	6.21893
evm.TU.contig579.64	3.98833	1.87908	3.9325	11.9566	7.05656	8.24317	209.676	252.947	213.071	7.47202	7.24706	6.2116
evm.TU.contig580.231	1.76069	1.03049	2.54649	2.28831	8.1152	3.80933	0.539816	0.225251	0.112806	0.448789	1.22026	6.16218
evm.TU.contig205.54	7.87639	12.8291	6.78959	12.9381	17.9889	15.3006	12.0676	13.4704	13.0504	8.19787	7.47825	6.12585
evm.TU.contig144.10	6.46807	10.6715	5.32957	5.4662	9.98155	8.1182	6.86552	8.64578	6.97343	5.05971	5.7334	6.07753
evm.TU.contig552.12	4.4898	5.74823	6.78535	0.259344	0.545163	0.266656	0	0	0	8.4115	5.0164	5.82717
evm.TU.contig480.149	5.1701	5.19545	7.04201	6.88846	5.27933	8.99453	3.51717	5.0668	3.71869	5.22157	5.89409	5.80395
evm.TU.contig222.145	4.21598	8.37189	1.81791	139.78	298.911	174.304	0	0.154105	0.077176	5.98721	4.78131	5.79676
evm.TU.contig9.4	17.3441	21.9206	3.45715	4.08301	24.7948	3.84827	0.449488	0.351674	0.763182	3.8537	5.369	5.32576
evm.TU.contig301.1	0.810169	0.885119	1.37893	0.140394	0.112426	0.625522	0.185467	0.532059	0.242233	7.17956	4.9071	5.29291
evm.TU.contig452.23	15.9278	17.3894	25.0396	4.09468	2.36816	4.63892	3.64374	3.76191	3.76794	4.72354	5.75101	5.24526
evm.TU.contig558.3	0.159533	0.816993	0.561786	4.56149	1.49433	2.9846	0.82172	0.142868	0	5.69297	2.67367	5.1647
evm.TU.contig559.3	7.02474	5.63928	3.95572	2.57719	4.93994	2.93174	17.9828	15.4155	17.2567	5.98467	5.58227	5.03896
evm.TU.contig340.126	14.1046	16.6955	5.87397	4.97617	9.7571	3.83734	2.75518	2.19344	1.96968	7.38411	3.57594	5.02512
evm.TU.contig480.21	3.26886	2.88305	1.51882	5.34988	4.34714	10.0307	11.3027	9.02608	8.47041	3.72631	6.72785	5.00525
evm.TU.contig358.85	4.7514	4.01606	7.95976	6.67486	6.14536	7.1918	6.33616	7.97305	6.28935	4.81502	5.33039	4.92421
evm.TU.contig271.23	8.56823	7.88553	0.327962	2.79741	4.52338	1.99127	0.426406	0.111205	0.222767	2.99112	4.92899	4.8893
evm.TU.contig509.182	3.04992	3.22459	5.11021	2.17374	1.94551	2.80474	0.168919	0.484588	0.529488	5.35407	3.55807	4.86371
evm.TU.contig357.655	1.20704	0.558325	1.40542	1.85552	0.891533	1.66501	48.6681	45.4348	41.1071	4.23788	9.44491	4.7696
evm.TU.contig289.125	3.60539	5.25506	2.2381	0.120149	0	0.041179	16.7452	19.1242	22.057	6.43294	3.54716	4.69146
evm.TU.contig127.179	1.23069	1.54062	2.70861	11.4926	7.47165	16.5067	4.75424	3.61251	3.92494	5.00168	6.39269	4.66618
evm.TU.contig528.1	13.5424	15.2745	5.21295	7.79085	17.8606	6.20324	5.88344	6.82492	5.31131	4.30437	5.02964	4.60536
evm.TU.contig522.342	1.49823	0.255754	1.97846	56.6851	38.9825	70.2956	0	0	0	5.56921	2.64308	4.58815
evm.TU.contig323.25	0	0	0.246638	0	0	0.249583	0	0	0.753875	3.24916	3.21253	4.4123
evm.TU.contig62.199	31.0058	19.6078	30.0721	8.65138	5.46945	9.63097	0	0	0	2.54509	1.92041	4.07264
evm.TU.contig308.72	2.26567	2.64436	5.47355	10.6828	5.09992	11.4064	5.15648	7.64408	5.67135	6.48685	3.76457	4.05697
evm.TU.contig336.65	0.319067	0.43573	0.280893	0.829362	0.885529	1.70548	0	0	0.190795	4.74414	6.28548	4.00148
evm.TU.contig299.8	16.6335	22.9337	9.57454	4.28329	8.83736	5.5439	6.09113	6.19793	5.47752	4.5659	3.59102	3.91832
evm.TU.contig357.65	4.15171	5.57524	5.27944	4.07686	4.22493	5.34248	5.06893	4.70947	4.05498	3.1277	4.23176	3.87479
evm.TU.contig127.87	4.02406	5.32151	5.06729	4.19278	4.02906	5.44545	3.27959	4.56163	3.24395	3.49909	4.49305	3.8329
evm.TU.contig552.74	0.4786	0.653595	3.08982	2.34986	1.66037	2.84247	4.79337	4.0003	4.86529	3.13113	4.22159	3.76884
evm.TU.contig522.1357	4.13815	5.17335	6.72358	6.35368	4.30684	6.88519	2.08967	1.88018	1.69214	4.23466	3.40858	3.75386
evm.TU.contig579.188	2.65071	2.26244	4.9005	4.44028	2.39093	4.09316	1.74458	1.42428	0.951042	3.0742	3.19542	3.63354
evm.TU.contig136.15	3.42239	3.50531	4.36875	4.00318	4.27429	4.80203	3.48887	3.83109	4.2977	3.66385	3.28294	3.59338
evm.TU.contig340.14	1.00577	1.7091	2.41484	1.50523	1.40363	1.07929	1.70722	1.392	1.25071	5.20014	3.89142	3.58008
evm.TU.contig535.20	142.673	177.267	71.3173	1.64625	4.49423	1.23103	0.518981	0.232026	0.077466	3.46714	1.98066	3.40045
evm.TU.contig273.384	8.71922	7.43315	7.35429	0.090476	0	0.093026	54.5473	56.8094	56.9472	4.33183	1.93426	3.38053
evm.TU.contig193.422	3.87281	3.33559	1.78222	25.7007	58.903	30.5027	1.66233	0.788236	1.34215	3.84766	3.49373	3.31157
evm.TU.contig507.9	2.14005	5.23373	5.11375	5.10862	4.59095	6.26425	2.28707	2.22939	1.76286	4.48078	3.69831	3.24817
evm.TU.contig490.9	3.71759	3.9053	19.3851	9.49809	2.08338	3.7365	2.29127	1.10974	1.45353	2.63625	1.76571	3.08596
evm.TU.contig552.76	2.71207	2.61438	5.75831	3.17922	1.99244	3.97946	5.75204	5.71471	7.58412	4.26973	5.06591	3.0709
evm.TU.contig155.238	44.7266	37.8391	25.5074	0.974923	1.07348	1.08594	1.20743	0.587799	1.59801	2.17495	1.32334	3.03558
evm.TU.contig184.21	0.164091	0.756302	3.10587	2.06156	0.683122	2.48513	5.98682	7.71486	5.81381	2.85462	2.24347	2.94328
evm.TU.contig195.156	3.34703	4.67472	3.88414	1.53789	1.63618	1.71678	1.95907	1.90743	2.36536	3.48364	3.66803	2.92854
evm.TU.contig572.4	31.1859	25.0737	3.49297	2.02828	20.9361	2.47428	0.068122	0.106596	0.28471	2.47777	3.35977	2.81198
evm.TU.contig449.20	5.57911	8.73949	3.46702	0.568705	2.04937	0.877106	0.140866	0.440849	0.29437	2.63503	1.73688	2.44077
evm.TU.contig508.26	1.77921	4.01983	2.21131	2.9925	2.83208	4.05587	1.57231	2.10885	2.01835	2.56767	3.04647	2.38092
evm.TU.contig148.10	2.06048	1.57493	2.78863	0.479631	0.256057	0.383563	0.448811	0.440652	0.331019	2.22232	1.65473	2.36793
evm.TU.contig432.92	0	0	0	0	0.363639	0.466901	2.77448	3.28541	3.13398	2.80536	2.69668	2.29283
evm.TU.contig36.25	1.87988	1.9907	2.27208	1.87728	2.55342	2.35598	2.68056	2.85339	3.17234	2.47301	1.7425	2.11877
evm.TU.contig432.175	27.2509	28.6915	20.7918	50.2187	81.5477	49.4416	0.553404	0.419856	0.420529	3.65977	2.01602	2.05107
evm.TU.contig579.159	3.73818	3.13261	4.90649	1.06001	1.41475	1.33209	0.758511	1.21733	0.853499	1.69778	1.55874	1.903
evm.TU.contig579.14	0.090802	0	0.079938	0.708072	0.283509	0.161785	0.07795	0.162632	0.325785	2.02517	1.92224	1.66842
evm.TU.contig273.87	0.265581	0.136008	0.35071	1.20809	0.414612	2.01109	2.62191	3.03243	1.78664	1.5993	1.81553	1.62663
evm.TU.contig369.134	1.65635	0.737599	0.950986	1.31034	3.82249	0.705718	0.5564	0.257968	0.516763	1.79891	1.96919	1.57527
evm.TU.contig370.419	0	0	0.224714	0.884653	0	0.227398	0.876502	0	0	1.59403	0.225152	1.56337
evm.TU.contig69.12	0	0	0	2.99934	0	5.60707	174.79	195.866	156.097	1.40375	1.94309	1.37674
evm.TU.contig355.1	1.50894	1.10393	1.89772	0.266819	0.1282	0.411511	0.449413	0.220621	0.055244	2.1154	1.08652	1.29333
evm.TU.contig493.25	6.42596	3.3731	8.20286	21.1574	13.961	32.2015	0	0.071933	0.144097	2.57975	1.34619	1.26506
evm.TU.contig20.2	13.4339	10.4213	2.02943	0.895366	8.19038	2.54937	0.13648	0.035593	0.178252	1.17011	1.64773	1.25193
evm.TU.contig357.324	4.48442	4.19017	2.42415	0.136333	0.327524	0.42053	0	0	0.211705	1.33356	0.832752	1.17023
evm.TU.contig493.45	0.222317	0.227704	0.326198	0.064209	0	0.264075	5.28022	5.90643	7.44472	2.11558	1.5688	1.16712
evm.TU.contig273.244	0	1.00553	0.172857	0.510377	1.83918	1.04953	0.168558	0.351674	0.352238	0.350336	1.73194	1.03079
evm.TU.contig244.164	0.190646	0.097632	0.251755	0.578144	0.099209	0.679363	0.73648	0.426825	0.427509	0.425201	1.09306	1.00085
evm.TU.contig515.162	0.542664	0.741084	1.59246	1.25384	1.5061	0.966889	0	0	0.162251	0.484126	0.638225	0.949628
evm.TU.contig601.6	2.55253	1.30719	1.21	0	0	0	0.252837	0.879186	0.264178	0.875841	1.55874	0.944893
evm.TU.contig305.435	3.97367	2.48013	5.30205	2.31325	1.42163	2.15721	0.533008	0.556026	0.278458	2.21564	1.36916	0.923535
evm.TU.contig583.20	37.8807	33.7922	18.9334	0.211752	3.56096	0.653164	0	0	0	3.0524	0.431141	0.855339
evm.TU.contig62.172	14.9143	11.4567	3.49425	1.30266	3.12949	0.482179	0.258132	0.484703	0.269711	1.50223	0.742646	0.789285
evm.TU.contig512.6	4.83207	2.76817	4.39815	0.816057	1.02286	0.802581	1.33584	0.586751	0.771344	1.89969	1.0475	0.788253
evm.TU.contig221.170	2.72221	2.99218	7.13111	1.78337	0.414612	1.83364	0.056998	0	0	1.18466	0.995612	0.75522
evm.TU.contig64.414	1.44711	2.17693	1.39341	1.13629	0.988376	0.846028	2.48457	4.45477	1.7442	0.645502	0.997226	0.751789
evm.TU.contig455.61	0.283615	1.16195	2.74651	1.22868	0	1.76865	0	1.26994	0.508788	0.253021	0.250168	0.744461
evm.TU.contig93.31	0.230496	0.629549	0.473479	0.79885	1.03953	0.82137	0.725532	0.550447	0.275664	0.753985	0.542171	0.739482
evm.TU.contig80.29	0.57432	0.336134	1.51682	0.924146	1.19546	1.09638	2.53559	2.71857	2.06059	1.17112	0.868442	0.717874
evm.TU.contig524.8	1.2398	0	0.385225	0	0.227707	0	1.37736	1.24091	1.37373	0.78075	0.707619	0.701921
evm.TU.contig598.14	0.158433	0	0	0.137274	0	0.141144	0.136009	0.141882	0.284219	0.141343	1.11799	0.693119
evm.TU.contig273.10	0	0	0	0	0	0	0	0	0	0.442786	0.31271	0.682423
evm.TU.contig487.7	0.062939	1.03143	0.221636	0	0	0	0.054031	0.112729	0.508091	0.954547	0.444134	0.660837
evm.TU.contig119.1	0	0	0	0	0	0	0	0	0	0	0	0.648402
evm.TU.contig168.91	0.299645	0.204604	1.14311	0	0	0.177964	4.97319	4.11459	2.9565	0.891073	0.704822	0.611753
evm.TU.contig586.14	4.83119	5.75612	5.03437	1.28142	4.41244	2.02023	0.169281	0.44148	0.176875	0.35184	0.347874	0.603876
evm.TU.contig300.288	1.20607	2.29412	4.09542	5.67284	2.15184	4.91179	0.443729	1.54297	0.154544	2.15194	1.3678	0.603014
evm.TU.contig414.18	3.25734	3.51185	2.94309	0.148542	0	0	0	0	0	0.382363	0.226832	0.600014
evm.TU.contig106.251	2.96669	5.45384	3.68323	1.12046	0.712528	0.406606	2.08967	1.8393	0.818778	0.407179	0.872276	0.59902
evm.TU.contig106.115	0.562599	0.384154	0.082548	0.081244	0	0	0.241485	0	0	0	0.330835	0.574299
evm.TU.contig184.25	0.76576	0.065359	0.224714	0	0	0.113699	0.328688	0.514324	0.457909	0.113859	0.506591	0.558346
evm.TU.contig178.45	0.343733	0.469415	0.554781	1.98551	0.953987	2.60288	0.983605	1.64173	1.74714	0.408871	0.252664	0.551384
evm.TU.contig269.124	0.264489	0.116099	0.831591	0.883925	0.117973	0.875183	0.778472	0.81209	0.643935	0.4045	0.233298	0.528959
evm.TU.contig34.109	2.49517	1.23375	0.454479	0.298198	1.97005	0.383255	0.147725	0	0.077176	0.84435	0.227681	0.526978
evm.TU.contig369.159	0.042152	0.12952	0.259762	0.109567	0	0.262864	0.542788	0.943713	0.75618	0.188025	0.223086	0.516342
evm.TU.contig531.51	0	0	0	0	0.073794	0	0	0	0	1.01208	0.687963	0.496308
evm.TU.contig507.226	1.78677	0.313725	1.07863	0.088465	0	0.318357	0.1753	0.045718	0.091582	0.592069	0.225152	0.491345
evm.TU.contig317.162	0.139229	0	0.245143	0	0.28981	0.124035	0.239046	0.374054	0.499537	0.12421	0.36843	0.487284
evm.TU.contig509.119	0.543276	0.476947	0.683253	3.833	3.55408	7.32897	0.866138	2.50212	1.46191	0.415433	0.136916	0.475349
evm.TU.contig273.88	2.11244	0	0.232463	0	0	1.1762	0.680044	0.236471	0.710549	1.88457	1.86332	0.462079
evm.TU.contig289.37	0.415797	0.212936	0.457563	0.090066	0.108187	0.370422	0	0	0.093239	0.278208	0.733525	0.454761
evm.TU.contig62.253	0.216725	0	0.190795	0.250373	0.225559	0.257432	0.434116	0.12939	0.129597	0.257795	0	0.442463
evm.TU.contig588.2	0.584762	0.941176	1.39732	0.289523	0.6086	0.446527	0.430283	0.673297	0.224792	0.447157	0.073686	0.438555
evm.TU.contig545.39	0	0	0	0	0	0	0.272393	0.170494	0	0.849227	0.167931	0.388683
evm.TU.contig579.151	0	0	0	0.625933	0	0.772295	0	0	0	0.128897	0.127444	0.379254
evm.TU.contig88.33	0	0.201106	0.172857	0	0	0	0	0.087919	0	0.350336	0	0.343598
evm.TU.contig566.14	1.86468	0.91673	0.065663	0.064626	0.388138	0	0.960452	1.4027	2.07397	0.266165	0.197373	0.326306
evm.TU.contig61.50	0.365988	0.749711	0.198277	0.439074	0.380908	0.451452	0.145009	0.12606	0.176766	0.150696	0.148997	0.320228
evm.TU.contig174.31	0	0	0.319752	0.078675	0	0.080893	0.233849	0	0.081446	0.24302	0.160187	0.317794
evm.TU.contig44.4	0.180888	0.370542	1.27397	0	0	0	0	0	0	1.77513	0.957337	0.316543
evm.TU.contig233.322	0.342878	0	0.301855	0	0	0.30546	0.588695	0	0	0	0	0.300007
evm.TU.contig217.106	51.4316	54.2932	12.4968	2.49551	7.92218	1.77167	0.05887	0	0	0.183534	0.181465	0.300007
evm.TU.contig193.167	6.91746	5.33566	3.75916	2.9598	4.17746	1.06513	0.87976	0.305917	0.689417	0.380942	0.602636	0.298892
evm.TU.contig522.930	0	0	0	0	0	0	0	0.097502	0	0.291394	0.096036	0.285789
evm.TU.contig580.119	0.258121	0.462657	0.681718	0.055912	0	0.057488	0.941747	2.08041	1.21552	0.402985	0.227681	0.28231
evm.TU.contig94.85	0	0	0	0	0	0	0	0	0	0.136631	0.135091	0.268006
evm.TU.contig206.120	6.87766	6.85064	8.90535	0.655298	1.18071	0.989602	0.649261	0.465643	0.466389	0.590382	0.229321	0.227474
evm.TU.contig336.122	0	0	0	0	0	0	0	0.112421	0	0.447971	0	0.219677
evm.TU.contig505.6	0	0	0.645456	0	0	0	0.209801	1.31317	0.219212	1.30817	0.431141	0.213835
evm.TU.contig44.13	0	0	0	0	0	0	0	0	0	0	0	0.213835
evm.TU.contig252.34	0	0	0	0	0	0	0	0	0	0.104565	0	0.205107
evm.TU.contig357.401	2.62546	3.36134	6.64513	0.189568	0	0	2.53559	3.42882	1.96247	0.097594	0.192987	0.191433
evm.TU.contig62.181	0.326627	0	0.958498	0.283005	0	0.387977	0	0	0	0	0	0.190526
evm.TU.contig305.47	6.09897	5.41385	1.96874	0.176148	0	0.181113	0.349049	0.455154	0.27353	0.634791	0.717297	0.17788
evm.TU.contig348.10	0.131649	0.809034	0.985138	0.741435	0.205524	0.527772	0	0	0	0.058724	0.406434	0.172783
evm.TU.contig220.17	0.44349	0	0.078086	0.38426	0.461569	0.711167	0.456864	0.873755	0.716036	0	0.156476	0.155216
evm.TU.contig522.1001	0	0	0.456187	0	0	0	0	0	0	0	0.152358	0.151131
evm.TU.contig458.61	0.323561	0	0	0	0	0	1.38882	0	1.1609	0.144329	0	0.141553
evm.TU.contig357.4	0	0	0	0	0.166037	0.568495	0	0	0	0.284648	0.703598	0.139587
evm.TU.contig522.636	0	0	0	0	0	0.069376	0.200555	0.139478	0.069851	0	0.06869	0.136274
evm.TU.contig220.12	0	0	0.128002	0.377937	0.529636	0.453357	0.561682	0.45573	0.652086	0.064857	0.320627	0.127218
evm.TU.contig217.145	0.120276	0.492762	0.529432	2.70954	0.625898	3.96458	1.85855	2.36966	1.94192	0.53651	0.636554	0.105238
evm.TU.contig94.43	12.0165	14.359	1.65943	0	0	0.209906	0	0	0	0.105101	0.311748	0.103079
evm.TU.contig61.193	0.056306	0.346021	0.223062	0.097572	0.351607	0.100323	0.290019	0.378179	0.050505	0.12558	0.124164	0.098532
evm.TU.contig480.159	0	0.334541	0.287549	0.18867	0.113314	0.193989	0.841192	0.292506	1.36722	0.388525	0.288109	0.095263
evm.TU.contig260.3	0.774364	0.088125	0.075746	0.372747	1.61186	0.076651	0	0.154105	0.077176	0.230277	0.151788	0.075283
evm.TU.contig399.5	1.37151	0.087796	0.905566	0	0	0	0.220761	0	0	0.152945	0	0.075002
evm.TU.contig233.153	0	0	0.212887	0.139682	0	0.07181	0.899568	0.649672	0.578412	0.431467	0.142201	0.070528
evm.TU.contig336.117	0.078139	0.080032	0.550321	0.609327	0.243972	2.15796	0.804951	0.69976	1.12141	0.487969	0.137848	0.068369
evm.TU.contig370.253	0.345976	0.212615	0.791915	0.059954	0.072016	0.123288	0	0	0	0	0	0.060544
evm.TU.contig106.140	0.271065	0.138817	0	0.234864	0	0	0	0	0.060784	0	0.119549	0.059293
evm.TU.contig189.2	0.249704	1.27877	0.659488	0	0	0	0	0	0	0	0.220257	0
evm.TU.contig522.1294	0	0	0	0	0	0.077817	0	0.078224	0	0.155853	0	0
evm.TU.contig87.111	0.499409	0	0.439659	2.88474	0	2.66945	0	0	0	0.297024	0.146838	0
evm.TU.contig442.48	0	0	0	0.077753	0	0	0	0	0	0	0	0
evm.TU.contig515.277	0.2393	0	0.42134	0	0	0	0	0	0	0	0	0
evm.TU.contig260.14	0	0.140474	0	0	0	0	0	0	0	0	0	0
evm.TU.contig127.180	0	0	0.115567	0	0	0	0	0	0	0	0	0
evm.TU.contig280.110	0.568986	0.218539	0.626139	0.123249	0.370113	0.316808	0.244226	0.127387	0.255182	0	0.125471	0
evm.TU.contig280.113	1134.36	1278.15	1883.79	0.206266	0	0	0.204366	0.213191	0	0	0.104993	0
evm.TU.contig62.54	1.28579	1.05356	0.226391	0.074271	0	0.15273	0.367935	0	0.153775	0	0.075611	0
evm.TU.contig522.1101	0.144483	0.221976	0.190795	0.500747	0.225559	0.386147	0	0	0	0	0	0
evm.TU.contig263.6	0	0	0	0	0	0	0	0.209928	0	0	0	0
evm.TU.contig515.64	0.640357	0	0.070468	0	0.083308	0	0.618438	0.716828	1.50775	0.21423	0.14121	0
evm.TU.contig233.149	0	0	0.521245	0.205203	0	0.210988	0	0	0	0.211285	0	0
evm.TU.contig118.6	0	0	0.705499	0	0	0	0	0	0	0	0	0
evm.TU.contig280.45	0	0.22409	0.096306	0	0	0	0	0	0	0	0	0
evm.TU.contig425.4	0	0	0	0	0	0	0.090465	0	0	0	0.092952	0
evm.TU.contig579.59	0	1.56863	1.12357	0	0	0	0	0	0	0	0	0
evm.TU.contig195.95	0	0	0.384006	0.251958	0.151325	0.388591	1.12336	1.43229	0.91292	0.129713	0	0
evm.TU.contig106.188	0.848749	0.811359	0.298881	0	0	0	0	0	0	0	0	0
evm.TU.contig193.60	0	0.247678	0	0	0	0	0	0	0	0	0	0
evm.TU.contig32.14	0.170169	0	0.14981	0	0	0	0	0	0	0	0	0
evm.TU.contig468.37	0	0	0	0	0	0	0	0	0	0	0.125861	0
evm.TU.contig37.26	0	0	0	0	0	0	0	0.098908	0	0	0	0
evm.TU.contig56.97	0.835374	0.713012	0.490286	3.25713	7.67995	3.72106	0	0.124685	0	0.24842	0	0
evm.TU.contig153.5	0	0	0.293106	0	0	0	0	0	0	0	0	0
evm.TU.contig522.785	0.328183	0	0	0.284353	0	0	1.12693	0	0	0	0	0
evm.TU.contig370.264	0	0.073992	0	0	0	0	0	0	0	0	0	0
evm.TU.contig370.262	0.068169	0	0	0	0	0	0	0.183142	0.12229	0.060815	0	0
evm.TU.contig370.263	0.273486	0.210084	0.300957	0	0	0	0	0	0	0	0	0
evm.TU.contig91.43	1.99764	0.837014	1.27901	0	0	0	0	0	0	0	0	0
evm.TU.contig369.105	0.82313	0.613144	0.329386	0	0	0	0	0	0	0.467305	0	0
evm.TU.contig204.3	0.180888	0	0	0	0	2.25607	0	0	0	0	0.079778	0
evm.TU.contig522.278	0.168918	0	0	0	0	0	0	0	0	0	0	0
evm.TU.contig263.12	0.787639	0.806722	0.46227	0	0	0	0	0	0	0	0	0
evm.TU.contig369.115	0.757345	1.37901	1.33347	0	0	0	0.144478	0.075359	0	0	0	0
evm.TU.contig221.99	361.343	402.818	359.824	0	0.124528	0.106593	0.102715	0	0	0	0	0
evm.TU.contig579.61	0	0	0	0	0	0	0.146084	0	0	0.303625	0	0
evm.TU.contig111.22	0.816569	1.11514	0.431324	0	0.056657	0	0	0	0	0	0	0
evm.TU.contig370.50	0.929047	0.259516	2.30498	0.146358	0	0	0	0	0	0	0	0
evm.TU.contig522.339	0.820457	0	0.240765	0	0	0	0	0	0	0	0	0
evm.TU.contig579.62	26.956	26.1859	58.9603	0.240782	0	0	0	0	0	0	0	0
evm.TU.contig289.20	0	0	0.073543	0	0	0	0	0	0	0	0	0
evm.TU.contig600.47	0.057866	0.059268	0	0	0.180675	0.051551	0.049676	0.155463	0	0.051624	0	0
evm.TU.contig271.24	0	0.324544	0.069739	0.137274	0	0.070572	0.408027	0.56753	0.14211	0.141343	0	0
evm.TU.contig239.137	0	0	0.112357	0.221163	0.199244	0.170548	0	0	0	0	0.056288	0
evm.TU.contig64.151	0.194685	0	0	0	0	0	0	0	0	0	0	0
evm.TU.contig184.235	0	0	0	0	0	0	0.142221	0	0	0	0	0
evm.TU.contig232.72	0	0	0.10012	0	0	0	0	0	0	0	0	0
evm.TU.contig155.35	0	0	0.299619	0	0	0	0	0	0	0	0.150101	0
evm.TU.contig300.74	0	0.522876	0	0	0	0	0	0	0.152636	0	0.150101	0
evm.TU.contig214.15	0.153664	0	0	0	0.079964	0.205343	0.395745	0.068806	0	0.068544	0.067771	0
evm.TU.contig199.59	0	0	0	0	0	0.084221	0	0	0	0	0	0
evm.TU.contig168.464	0	0	0.407201	0	0	0	0	0	0	0	0	0
evm.TU.contig340.8	0.074346	0.076147	0.589057	0	0	0.066232	0	0	0	0	0	0
evm.TU.contig559.186	0	0	0	0.214799	0	0.147236	0.14188	0.296014	0.222366	0	0	0
evm.TU.contig392.6	0	0	0	0	0	0	0	0	0.101009	0	0	0
evm.TU.contig126.245	0	0	0.049208	0	0	0	0	0	0	0	0	0
evm.TU.contig127.72	0	0	0	0	0	0	0	0	0	0	0.088103	0
evm.TU.contig487.48	0	0	0.0868	0	0	0	0	0	0	0	0.173937	0
evm.TU.contig480.70	0.174698	0	0.384492	0	0	0	0	0	0	0	0	0
evm.TU.contig168.490	0	0	0.501429	0	0	0.169139	0	0	0	0	0	0
evm.TU.contig293.4	0.124852	0	0	0.216355	0	0.111227	0	0	0	0.111384	0	0
evm.TU.contig412.4	0	0	0	0	0	0.587134	0	0	0	0	0	0
evm.TU.contig600.102	0	0	0	0	0.139007	0	0	0.11961	0	0	0.117812	0
evm.TU.contig75.120	0	0	0.146553	0	0.693023	1.03812	0	0	0	0.148512	0.146838	0
evm.TU.contig579.60	0.459456	0	0.134829	0	0	0	0	0	0	0	0	0
evm.TU.contig374.128	0.696145	0	0	0	1.44905	0	0	0.623423	0.624422	0	0	0
evm.TU.contig103.5	0	0	0.264947	0.04346	0	0.044685	0.04306	0	0	0.044748	0	0
